# Supplementary material for: Brain atlas for glycoprotein hormone receptors at single-transcript level
Source: eLife. 2022 Sep 2;11:e79612. doi: 10.7554/eLife.79612 (PMC9473692; doi:10.7554/eLife.79612)
Supplement: Figure 1—figure supplement 1—source data 1. [file elife-79612-fig1-figsupp1-data1.xlsx]

## Sheet: Sheet1
Figure 1-figure supplement 1-source data 1: Tshr transcript count in brain regions, nuclei and subnuclei
Tissues	Tshr transcript count
Whole thyroid	85240
Thyroid follicular cells	85240
Whole brain	93060
Brain
Regions	Tshr transcript count
Ventricles	35374
Olfactory bulb	14386
Forebrain	18309
Hypothalamus	5052
Medulla	5869
Cerebellum	1126
Midbrain & pons	3101
Cerebral cortex	7716
Hippocampus	2042
Thalamus	85
Ventricular regions
Regions, nuclei and subnuclei	Tshr transcript count
3V	25349
SVZ	10025
Olfactory bulb
Regions, nuclei and subnuclei	Tshr transcript count
VTT	1045
GrO	5213
AOP	1239
Tu	1760
AOM	1028
AOV	602
DTT	685
Gl	1994
AOB	43
AOE	73
AOL	476
EPI	104
lo	28
AOD	44
Forebrain
Regions, nuclei and subnuclei	Tshr transcript count
HDB	1695
AAV	232
AcbSh	4954
SI	915
BSTMPL	100
MPOM	186
AcbC	1723
VDB	459
BSTMPM	161
VP	2365
MCPO	486
MPA	888
AAD	23
MS	528
BSTLD	113
ac	101
LPO	607
MnPO	29
BSTLP	86
BSTMP	22
LSI	896
BSTMPI	40
BSTMA	27
CPu	1650
BSTLV	4
BSTMV	3
st	16
Hypothalamus
Regions, nuclei and subnuclei	Tshr transcript count
MTu	498
Arc	165
AHP	197
MeAD	84
MCLH	57
CeM	32
LH	1827
DM	268
MeAV	13
PMD	7
MePD	246
LA	83
VMH	460
ACo	114
MM	80
AHA	241
PMV	14
PLCo	163
BMA	62
AHC	30
PH	104
MePV	21
ZIV	56
PMCo	98
TC	72
BLP	25
BLA	27
BMP	8
Medulla
Regions, nuclei and subnuclei	Tshr transcript count
SolV	45
tz	16
SolC	247
SpVe	1209
SolM	142
Cu	427
SolIM	142
MVePC	2003
PCRtA	26
Pr	212
LVe	31
AP	64
VLL	60
SolG	4
LPGi	8
IO	7
DMSp5	32
MVeMC	354
sp5	19
Sp5O	48
Sol	22
VCA	8
Sp5I	130
DPGi	53
PCRt	60
MdD	58
Sp5C	71
DC	4
MdV	203
Gi	96
IRt	68
Cerebellum
Regions, nuclei and subnuclei	Tshr transcript count
PFI	5
Sim	62
pcn	219
Crus1	45
ppf	73
plf	132
sf	109
pcuf	325
prf	156
Midbrain and pons
Regions, nuclei and subnuclei	Tshr transcript count
LDTg	847
DRV	261
DTgP	88
DRI	50
VLTg	31
LPB	247
MPB	104
PPTg	165
CGPn	288
Me5	34
LC	48
DRD	26
CnF	96
PnO	390
PnC	104
SNR	119
LPAG	43
InWh	21
DpMe	119
DpG	20
Cerebral cortex
Regions, nuclei and subnuclei	Tshr transcript count
DP	609
VO	683
MPtA	140
S1Sh	44
Cg/RS	109
S1ShNc	71
MO	171
RSA	533
Pir	1116
RSG	548
PrL	161
LPtA	66
M2	1037
V2MM	271
S1Tr	132
S1HL	77
V2ML	90
V2L	256
AIV	80
LO	143
M1	475
S1FL	117
V1	373
S1BF	250
AID	46
S1	98
IL	21
LEnt	51
Hippocampus
Regions, nuclei and subnuclei	Tshr transcript count
DG	1076
LMol	371
GrDG	155
CA2	11
PoDG	83
Mol	169
fi	25
Py	65
CA1	60
S	27
Thalamus
Regions, nuclei and subnuclei	Tshr transcript count
PPT	6
OT	7
LGP	60
APTD	12
