# Supplementary material for: Brain atlas for glycoprotein hormone receptors at single-transcript level
Source: eLife. 2022 Sep 2;11:e79612. doi: 10.7554/eLife.79612 (PMC9473692; doi:10.7554/eLife.79612)
Supplement: Figure 1—source data 1. [file elife-79612-fig1-data1.xlsx]

## Sheet: Sheet1
Figure 1-source data 1: Tshr density in brain regions, nuclei and subnuclei
Tissues	Tshr transcript count	Area (µm2, x 106)	Density (transcript/µm2, x 10-3)
Whole thyroid	85240	11.4658	7.43426
Thyroid follicular cells	85240	4.89993	17.3962
Whole brain	93060	1625.48	0.0572506
Brain
Regions	Tshr transcript count	Area (µm2, x 106)	Density (transcript/µm2, x 10-3)
Ventricles	35374	7.25864	4.87336
Olfactory bulb	14386	115.47	0.124587
Forebrain	18309	541.524	0.0338101
Hypothalamus	5052	162.69	0.031053
Medulla	5869	246.309	0.0238278
Cerebellum	1126	55.2295	0.0203877
Midbrain & pons	3101	277.033	0.0111936
Cerebral cortex	7716	1117.96	0.00690185
Hippocampus	2042	347.975	0.00586824
Thalamus	85	20.769	0.00409263
Ventricular regions
Regions, nuclei and subnuclei	Tshr transcript count	Area (µm2, x 106)	Density (transcript/µm2, x 10-3)
3V	25349	1.17196	21.6296
SVZ	10025	6.08668	1.64704
Olfactory bulb
Regions, nuclei and subnuclei	Tshr transcript count	Area (µm2, x 106)	Density (transcript/µm2, x 10-3)
VTT	1045	2.95233	0.353958
GrO	5213	17.086	0.305104
AOP	1239	4.98748	0.248422
Tu	1760	8.21181	0.214326
AOM	1028	9.67532	0.10625
AOV	602	5.69733	0.105663
DTT	685	7.07114	0.0968726
Gl	1994	22.3601	0.0891768
AOB	43	0.862932	0.0498301
AOE	73	1.47838	0.0493783
AOL	476	11.4327	0.0416348
EPI	104	9.33657	0.011139
lo	28	3.79466	0.00737879
AOD	44	10.5231	0.00418127
Forebrain
Regions, nuclei and subnuclei	Tshr transcript count	Area (µm2, x 106)	Density (transcript/µm2, x 10-3)
HDB	1695	7.65477	0.22143
AAV	232	1.09607	0.211665
AcbSh	4954	26.5579	0.186536
SI	915	5.95003	0.153781
BSTMPL	100	0.736191	0.135834
MPOM	186	1.45517	0.12782
AcbC	1723	19.3285	0.0891431
VDB	459	5.68221	0.0807784
BSTMPM	161	2.10583	0.0764546
VP	2365	31.5118	0.0750514
MCPO	486	6.64398	0.073149
MPA	888	12.901	0.0688321
AAD	23	0.358577	0.0641424
MS	528	10.3823	0.0508557
BSTLD	113	2.29672	0.0492006
ac	101	2.24665	0.0449559
LPO	607	15.611	0.0388828
MnPO	29	0.782611	0.0370555
BSTLP	86	2.43859	0.0352664
BSTMP	22	0.756793	0.02907
LSI	896	38.5678	0.0232318
BSTMPI	40	2.31497	0.0172788
BSTMA	27	2.18589	0.012352
CPu	1650	333.116	0.00495322
BSTLV	4	0.865279	0.00462279
BSTMV	3	0.778438	0.00385387
st	16	7.19866	0.00222263
Hypothalamus
Regions, nuclei and subnuclei	Tshr transcript count	Area (µm2, x 106)	Density (transcript/µm2, x 10-3)
MTu	498	1.36051	0.36604
Arc	165	0.463151	0.356255
AHP	197	0.746101	0.264039
MeAD	84	0.33615	0.249889
MCLH	57	0.444896	0.12812
CeM	32	0.358056	0.0893716
LH	1827	24.1694	0.0755914
DM	268	3.64054	0.0736155
MeAV	13	0.198978	0.065334
PMD	7	0.11996	0.0583526
MePD	246	4.44375	0.0553587
LA	83	1.56418	0.053063
VMH	460	10.1184	0.0454618
ACo	114	2.71971	0.0419162
MM	80	2.44771	0.0326836
AHA	241	7.84123	0.030735
PMV	14	0.646482	0.0216557
PLCo	163	10.1471	0.0160637
BMA	62	4.65394	0.013322
AHC	30	2.60627	0.0115107
PH	104	10.5213	0.00988471
MePV	21	3.24049	0.00648049
ZIV	56	10.6538	0.00525635
PMCo	98	19.052	0.0051438
TC	72	15.2031	0.00473586
BLP	25	7.90226	0.00316365
BLA	27	9.00328	0.00299891
BMP	8	8.08689	0.000989255
Medulla
Regions, nuclei and subnuclei	Tshr transcript count	Area (µm2, x 106)	Density (transcript/µm2, x 10-3)
SolV	45	0.10327	0.43575
tz	16	0.0430293	0.37184
SolC	247	0.885099	0.279065
SpVe	1209	14.4615	0.0836014
SolM	142	1.79914	0.0789264
Cu	427	5.59302	0.0763451
SolIM	142	2.16502	0.0655882
MVePC	2003	33.0196	0.0606609
PCRtA	26	0.486361	0.0534582
Pr	212	4.57883	0.0463
LVe	31	0.70907	0.0437192
AP	64	1.52506	0.0419655
VLL	60	1.46717	0.0408951
SolG	4	0.12309	0.0324966
LPGi	8	0.29286	0.0273168
IO	7	0.382048	0.0183223
DMSp5	32	1.7496	0.0182899
MVeMC	354	20.683	0.0171155
sp5	19	1.24759	0.0152294
Sp5O	48	3.22745	0.0148724
Sol	22	2.08835	0.0105346
VCA	8	0.857195	0.00933277
Sp5I	130	14.0883	0.00922752
DPGi	53	7.28551	0.00727471
PCRt	60	10.3695	0.00578618
MdD	58	10.8095	0.00536567
Sp5C	71	13.6517	0.0052008
DC	4	0.779742	0.0051299
MdV	203	45.761	0.0044361
Gi	96	25.2099	0.00380802
IRt	68	20.8663	0.00325884
Cerebellum
Regions, nuclei and subnuclei	Tshr transcript count	Area (µm2, x 106)	Density (transcript/µm2, x 10-3)
PFI	5	0.0873052	0.0572703
Sim	62	1.48234	0.0418259
pcn	219	7.39953	0.0295965
Crus1	45	1.6841	0.0267204
ppf	73	2.75225	0.0265237
plf	132	6.39323	0.0206469
sf	109	5.39114	0.0202184
pcuf	325	17.2446	0.0188465
prf	156	12.795	0.0121923
Midbrain and pons
Regions, nuclei and subnuclei	Tshr transcript count	Area (µm2, x 106)	Density (transcript/µm2, x 10-3)
LDTg	847	1.82887	0.463127
DRV	261	0.999583	0.261109
DTgP	88	0.380483	0.231285
DRI	50	0.518437	0.0964437
VLTg	31	0.413342	0.0749985
LPB	247	3.67053	0.0672928
MPB	104	2.24065	0.0464151
PPTg	165	4.71288	0.0350105
CGPn	288	8.79935	0.0327297
Me5	34	1.55036	0.0219304
LC	48	2.36504	0.0202956
DRD	26	1.29609	0.0200603
CnF	96	6.75898	0.0142033
PnO	390	29.5045	0.0132183
PnC	104	7.87175	0.0132118
SNR	119	27.4268	0.00433881
LPAG	43	16.3292	0.00263332
InWh	21	20.1893	0.00104015
DpMe	119	114.829	0.00103632
DpG	20	25.3479	0.000789021
Cerebral cortex
Regions, nuclei and subnuclei	Tshr transcript count	Area (µm2, x 106)	Density (transcript/µm2, x 10-3)
DP	609	13.6491	0.0446182
VO	683	15.4608	0.0441762
MPtA	140	4.20852	0.0332658
S1Sh	44	1.79497	0.0245129
Cg/RS	109	5.52078	0.0197436
S1ShNc	71	4.38481	0.0161923
MO	171	13.143	0.0130108
RSA	533	44.0779	0.0120922
Pir	1116	102.207	0.010919
RSG	548	52.291	0.0104798
PrL	161	17.3577	0.0092754
LPtA	66	7.32019	0.00901616
M2	1037	119.062	0.00870973
V2MM	271	35.0558	0.00773053
S1Tr	132	17.7886	0.0074205
S1HL	77	12.7528	0.00603788
V2ML	90	16.1305	0.00557949
V2L	256	49.2304	0.00520004
AIV	80	15.5443	0.0051466
LO	143	29.0586	0.0049211
M1	475	118.897	0.00399507
S1FL	117	33.5863	0.00348356
V1	373	126.305	0.00295316
S1BF	250	92.6529	0.00269824
AID	46	19.0398	0.00241599
S1	98	42.3997	0.00231134
IL	21	9.3071	0.00225634
LEnt	51	99.734	0.00051136
Hippocampus
Regions, nuclei and subnuclei	Tshr transcript count	Area (µm2, x 106)	Density (transcript/µm2, x 10-3)
DG	1076	29.9348	0.0359448
LMol	371	47.8232	0.00775774
GrDG	155	26.4528	0.00585949
CA2	11	2.50717	0.00438741
PoDG	83	20.3158	0.00408549
Mol	169	45.1468	0.00374334
fi	25	12.9482	0.00193078
Py	65	47.7038	0.00136258
CA1	60	68.4736	0.00087625
S	27	46.6687	0.000578546
Thalamus
Regions, nuclei and subnuclei	Tshr transcript count	Area (µm2, x 106)	Density (transcript/µm2, x 10-3)
PPT	6	0.629531	0.0095309
OT	7	0.993845	0.00704335
LGP	60	12.1679	0.00493101
APTD	12	6.97778	0.00171974
