# Supplementary material for: Brain atlas for glycoprotein hormone receptors at single-transcript level
Source: eLife. 2022 Sep 2;11:e79612. doi: 10.7554/eLife.79612 (PMC9473692; doi:10.7554/eLife.79612)
Supplement: Figure 1—source data 2. [file elife-79612-fig1-data2.xlsx]

## Sheet: Sheet1
Figure 1-source data 2: Tshr expression levels in mouse tissues
Tshr Normalized Ct values (N=4-5 mice/group, 3 technical qPCR replicates for each sample, normalized against Rps11, Tubg1 and Gapdh)
Thyroid (M)	Thyroid (F)	Hypothalamus (M)	Hypothalamus (F)	Hippocampus (M)	Hippocampus (F)	Liver (M)	Liver (F)
26.1897	25.186	30.6786	29.4768	31.8144	32.963	>40	>40
24.1971	24.995	30.1877	29.0121	32.0866	31.7071	>40	>40
25.1218	25.2359	32.3141	29.753	32.0591	31.8318	>40	>40
24.3478	24.5858	31.1077	29.8313	31.2462	32.563	>40	>40
26.5437			29.6583	32.4558		>40	>40
Tshr Relative expression level (arbituary units, N=4-5 mice/group)
Thyroid (M)	Thyroid (F)	Hypothalamus (M)	Hypothalamus (F)	Hippocampus (M)	Hippocampus (F)	Liver (M)	Liver (F)
48.8395	97.9316	2.17515	5.00358	0.98989	0.446509	Not expressed	Not expressed
194.359	111.799	3.05688	6.90506	0.819662	1.06629	Not expressed	Not expressed
102.392	94.6025	0.700079	4.1316	0.835437	0.978022	Not expressed	Not expressed
175.086	148.46	1.61558	3.91339	1.46767	0.589138	Not expressed	Not expressed
38.215			4.41183	0.634593		Not expressed	Not expressed
