# Supplementary material for: Brain atlas for glycoprotein hormone receptors at single-transcript level
Source: eLife. 2022 Sep 2;11:e79612. doi: 10.7554/eLife.79612 (PMC9473692; doi:10.7554/eLife.79612)
Supplement: Figure 2—figure supplement 1—source data 1. [file elife-79612-fig2-figsupp1-data1.xlsx]

## Sheet: Sheet1
Figure 2-figure supplement-source data 1: Lhcgr transcript count in brain regions, nuclei and subnuclei
Tissues	Lhcgr transcript count
Whole testis	13619200
Leydig cells	13619200
Whole brain	197021
Brain
Regions	Lhcgr transcript count
Ventricles	4543
Olfactory bulb	47458
Forebrain	6984
Hypothalamus	8343
Medulla	17296
Cerebellum	15697
Midbrain & pons	821
Cerebral cortex	28931
Hippocampus	19455
Thalamus	47493
Ventricular regions
Regions, nuclei and subnuclei	Lhcgr transcript count
OV	332
SVZ	3673
3V	538
Forebrain
Regions, nuclei and subnuclei	Lhcgr transcript count
SFO	42
ICjM	340
BAC	45
LAcbSh	581
MPOC	9
AVPe	26
BST	324
Acb	1068
TS	204
VOLT	42
AcbC	2934
BSTLI	113
AcbSh	3617
MnPO	104
VDB	752
BSTMPM	274
BSTLV	112
MPOM	187
VMPO	188
BSTMPI	290
BSTLD	273
BSTMPL	86
IPACL	674
LSS	39
BSTLP	263
IPACM	212
MPOL	83
BSTMA	227
MPA	1268
LSV	796
SHy	56
HDB	680
VP	2793
SI	495
ADP	60
MCPO	455
LPO	1060
CPu	22520
BSTIA	113
aci	173
BSTMV	47
SFi	278
MS	566
SHi	103
Ld	51
LSI	1778
fmi	568
LSD	383
st	102
BSTLJ	4
Cerebellum
Regions, nuclei and subnuclei	Lhcgr transcript count
PFI	639
FI	885
Crus1	1175
Ant	2491
Sim	1541
mcp	253
Olfactory bulb
Regions, nuclei and subnuclei	Lhcgr transcript count
MiA	16
GrO	3224
GrA	35
AOV	455
EPIA	47
AOD	711
Mi	90
AOL	731
AOM	602
AOE	80
Gl	1097
lo	175
AOB	36
DTT	293
Tu	326
AOP	172
EPI	209
VTT	41
GIA	3
Thalamus
Regions, nuclei and subnuclei	Lhcgr transcript count
SCO	38
LPLC	117
MHb	828
F	57
sm	60
PV	275
RI	39
PP	60
IMD	487
MDL	357
APTV	300
CM	658
LPMC	127
PoMn	29
PVP	50
MDC	275
SPF	68
Gus	36
Re	125
OPT	78
MDM	484
PPT	60
LHb	170
Eth	124
acp	166
SG	141
PrC	317
DLG	896
aca	601
fr	153
IGL	78
REth	59
VLGPC	166
PIL	296
LHbL	119
OT	75
PoT	214
VRe	12
VLG	31
IMA	53
VLGMC	191
LDVL	314
OPC	30
Sub	122
Rh	36
LHbM	101
APT	302
LPLR	444
CL	150
PF	415
LPMR	592
LGP	723
str	14
eml	101
VL	523
APTD	383
LDDM	82
VM	387
pv	657
Po	969
VPM	945
VPL	343
Ang	5
PC	93
MGP	55
MPT	16
ic	698
PLi	8
SubG	21
Rt	192
PVA	32
STh	73
Hypothalamus
Regions, nuclei and subnuclei	Lhcgr transcript count
PMD	42
VLPO	11
CeC	210
ArcLP	207
AHP	108
PMV	93
MMn	46
Arc	49
AStr	361
mt	26
ArcL	66
MePV	302
CeL	172
MM	227
PH	959
ACo	244
ArcMP	113
Te	40
DMC	52
ML	126
MCLH	37
ArcD	16
SubI	78
CeMPV	135
LM	36
VMHDM	143
DMV	145
VMHVL	183
LaDL	401
ns	196
BLA	695
PS	54
LaVM	148
DMD	128
LaVL	168
SuMM	101
AAD	97
PMCo	1325
MTu	93
DM	247
ZID	613
BMA	314
PeF	85
VMHC	138
AHiPM	433
AHiAL	190
MePD	273
ZIV	637
APir	494
BLV	77
PR	195
BLP	436
BMP	445
CxA	176
PSTh	71
AAV	158
SuML	25
PLCo	485
LH	1040
ZI	38
TC	604
ME	21
FF	20
cp	722
opt	127
Medulla
Regions, nuclei and subnuclei	Lhcgr transcript count
MVPO	10
LVPO	9
RPO	231
vsc	41
DLL	166
ml	22
PL	173
RMg	29
VLL	70
ILL	70
Midbrain and pons
Regions, nuclei and subnuclei	Lhcgr transcript count
DT	99
DRC	25
IPI	248
IPDM	59
IF	69
IPR	375
DRVL	71
IPC	198
MGV	863
DTgP	45
Min	9
PCom	32
MZMG	148
3PC	36
PPT	45
lfp	133
IPL	132
MGD	320
DMPn	21
DRD	124
Dk	108
MGM	113
CLi	40
SubB	231
Pn	467
DRV	82
DLPAG	428
Su3C	78
RPF	61
MnR	284
PP	193
DMPAG	653
PAG	457
LPAG	1246
DpWh	601
MA3	45
mlf	62
VTg	18
bic	273
SPTg	74
SNL	125
bp	117
VLPAG	361
InCo	116
PMnR	343
VLTg	27
BIC	296
IPDL	64
Op	887
RtTg	218
SuG	990
PN	51
MCPC	28
ts	150
InC	109
LDTg	108
ATg	41
PBG	42
3N	55
InWh	1146
InCG	49
SNC	239
RtTgP	101
ECIC	1042
pc	12
Su3	50
RC	121
RLi	156
InG	1404
DpG	1261
PPTg	228
ml	346
LPBC	84
KF	17
LPBS	62
CnF	300
Zo	361
mtg	18
VTA	411
MiTG	157
scp	186
MPB	95
RRF	52
csc	41
DpMe	4586
Sag	237
DRI	19
SPO	16
RMC	261
SNR	942
Tz	17
LPBE	31
CIC	291
RPC	219
DMTg	88
VTRZ	18
EMi	70
xscp	123
RR	36
SubCD	30
PnO	707
PnV	20
Mo5	53
PnC	176
PBP	132
DCIC	98
LPBV	7
Su5	36
Pr5VL	37
rs	11
SubCV	27
Pr5DM	8
IPF	2
Hippocampus
Regions, nuclei and subnuclei	Lhcgr transcript count
GrDG	8351
Py	4171
f	39
PaS	296
PrS	1244
S	1198
DG	750
Mol	914
PoDG	400
CA2	48
fi	195
LMol	699
CA1	538
Or	444
CA3	157
Rad	11
Cereebral cortex
Regions, nuclei and subnuclei	Lhcgr transcript count
SL	110
VEn	251
LEnt	5912
MEnt	1064
DEn	1198
Pir	5035
IL	451
CI	474
AIV	656
Ect	1589
PRh	1256
VO	559
AIP	317
DI	535
DP	450
AID	615
S1FL	1076
DLO	333
LO	917
MPtA	131
S1DZ	180
S1ULp	1316
S1Tr	514
LPtA	207
V2MM	987
S2	1590
TeA	1114
V2ML	418
Cg1	697
FrA	991
S1HL	303
RSA	1043
PrL	405
S1BF	2124
RSG	1116
Cg2	575
S1J	538
M1	2436
S1	846
MO	260
V1	2361
V2L	907
AuV	447
M2	2084
AuD	371
AI	399
Au1	335
