# Supplementary material for: Brain atlas for glycoprotein hormone receptors at single-transcript level
Source: eLife. 2022 Sep 2;11:e79612. doi: 10.7554/eLife.79612 (PMC9473692; doi:10.7554/eLife.79612)
Supplement: Figure 2—source data 1. [file elife-79612-fig2-data1.xlsx]

## Sheet: Sheet1
Figure 2-source data 1: Lhcgr density in brain regions, nuclei and subnuclei
Tissues	Lhcgr transcript count	Area (µm2, x 106)	Density (transcript/µm2, x 10-3)
Whole testis	13619200	147619	0.0922592
Leydig cells	13619200	9056.38	1.50382
Whole brain	197021	4002.46	0.049225
Brain
Regions	Lhcgr transcript count	Area (µm2, x 106)	Density (transcript/µm2, x 10-3)
Ventricles	4543	7.63491	0.59503
Olfactory bulb	47458	597.488	0.0794292
Forebrain	6984	93.9331	0.0743508
Hypothalamus	8343	116.447	0.0716463
Medulla	17296	247.518	0.0698779
Cerebellum	15697	252.516	0.0621623
Midbrain & pons	821	14.22	0.0577355
Cerebral cortex	28931	557.051	0.051936
Hippocampus	19455	467.043	0.0416557
Thalamus	47493	1609.55	0.029507
Ventricular regions
Regions, nuclei and subnuclei	Lhcgr transcript count	Area (µm2, x 106)	Density (transcript/µm2, x 10-3)
OV	332	0.483541	0.686601
SVZ	3673	5.99673	0.6125
3V	538	1.15464	0.465946
Forebrain
Regions, nuclei and subnuclei	Lhcgr transcript count	Area (µm2, x 106)	Density (transcript/µm2, x 10-3)
SFO	42	0.0611492	0.686845
ICjM	340	0.604812	0.562158
BAC	45	0.166747	0.26987
LAcbSh	581	2.33883	0.248415
MPOC	9	0.0457334	0.196793
AVPe	26	0.133346	0.194981
BST	324	1.69933	0.190663
Acb	1068	6.40885	0.166645
TS	204	1.22761	0.166177
VOLT	42	0.257957	0.162818
AcbC	2934	19.0428	0.154074
BSTLI	113	0.777211	0.145392
AcbSh	3617	26.1654	0.138236
MnPO	104	0.771045	0.134882
VDB	752	5.59824	0.134328
BSTMPM	274	2.07471	0.132067
BSTLV	112	0.852492	0.13138
MPOM	187	1.43367	0.130435
VMPO	188	1.45011	0.129645
BSTMPI	290	2.28076	0.12715
BSTLD	273	2.26278	0.120648
BSTMPL	86	0.725312	0.11857
IPACL	674	5.87443	0.114734
LSS	39	0.342744	0.113788
BSTLP	263	2.40255	0.109467
IPACM	212	1.94033	0.10926
MPOL	83	0.773871	0.107253
BSTMA	227	2.15358	0.105406
MPA	1268	12.7103	0.0997616
LSV	796	8.52312	0.093393
SHy	56	0.613291	0.0913107
HDB	680	7.54165	0.090166
VP	2793	31.0461	0.0899631
SI	495	5.8621	0.0844407
ADP	60	0.775156	0.0774038
MCPO	455	6.54579	0.0695103
LPO	1060	15.3803	0.0689193
CPu	22520	328.193	0.0686181
BSTIA	113	1.66079	0.0680398
aci	173	2.62608	0.0658778
BSTMV	47	0.766934	0.061283
SFi	278	4.56255	0.0609308
MS	566	10.2289	0.0553336
SHi	103	1.89665	0.0543062
Ld	51	1.05547	0.0483199
LSI	1778	37.9978	0.0467922
fmi	568	12.2779	0.046262
LSD	383	9.76948	0.0392037
st	102	7.09228	0.0143818
BSTLJ	4	0.49536	0.00807494
Cerebellum
Regions, nuclei and subnuclei	Lhcgr transcript count	Area (µm2, x 106)	Density (transcript/µm2, x 10-3)
PFI	639	4.90889	0.130172
FI	885	7.23873	0.122259
Crus1	1175	12.3264	0.0953235
Ant	2491	31.7457	0.0784674
Sim	1541	29.2414	0.0526993
mcp	253	8.47199	0.0298631
Olfactory bulb
Regions, nuclei and subnuclei	Lhcgr transcript count	Area (µm2, x 106)	Density (transcript/µm2, x 10-3)
MiA	16	0.0755372	0.211816
GrO	3224	16.8335	0.191523
GrA	35	0.407747	0.0858375
AOV	455	5.61314	0.0810598
EPIA	47	0.592993	0.0792589
AOD	711	10.3676	0.0685789
Mi	90	1.32653	0.0678464
AOL	731	11.2638	0.0648983
AOM	602	9.53234	0.0631534
AOE	80	1.45653	0.054925
Gl	1097	22.0296	0.0497965
lo	175	3.73858	0.0468092
AOB	36	0.850179	0.042344
DTT	293	6.96664	0.0420576
Tu	326	8.09045	0.0402944
AOP	172	4.91378	0.0350036
EPI	209	9.19859	0.0227209
VTT	41	2.9087	0.0140957
GIA	3	0.280824	0.0106829
Thalamus
Regions, nuclei and subnuclei	Lhcgr transcript count	Area (µm2, x 106)	Density (transcript/µm2, x 10-3)
SCO	38	0.0572953	0.663231
LPLC	117	0.264123	0.442975
MHb	828	3.04975	0.271497
F	57	0.214536	0.26569
sm	60	0.241514	0.248433
PV	275	1.72939	0.159015
RI	39	0.261811	0.148962
PP	60	0.405178	0.148083
IMD	487	3.31362	0.146969
MDL	357	2.44211	0.146185
APTV	300	2.3026	0.130287
CM	658	5.1093	0.128785
LPMC	127	1.03954	0.12217
PoMn	29	0.238687	0.121498
PVP	50	0.437551	0.114272
MDC	275	2.41591	0.113829
SPF	68	0.646177	0.105234
Gus	36	0.347112	0.103713
Re	125	1.20911	0.103382
OPT	78	0.800078	0.0974905
MDM	484	4.98751	0.0970423
PPT	60	0.620228	0.0967387
LHb	170	1.7854	0.0952166
Eth	124	1.31085	0.0945948
acp	166	1.76459	0.0940728
SG	141	1.55057	0.0909344
PrC	317	3.49244	0.0907674
DLG	896	10.1025	0.0886912
aca	601	6.93298	0.0866871
fr	153	1.77179	0.0863536
IGL	78	0.917752	0.0849903
REth	59	0.705785	0.0835948
VLGPC	166	2.03103	0.081732
PIL	296	3.65174	0.0810573
LHbL	119	1.51357	0.078622
OT	75	0.979158	0.0765964
PoT	214	2.79462	0.0765757
VRe	12	0.157498	0.0761916
VLG	31	0.408518	0.0758841
IMA	53	0.702445	0.0754507
VLGMC	191	2.55979	0.0746156
LDVL	314	4.24781	0.0739204
OPC	30	0.414941	0.0722994
Sub	122	1.70884	0.0713936
Rh	36	0.53801	0.0669132
LHbM	101	1.52847	0.066079
APT	302	4.59236	0.0657614
LPLR	444	6.89599	0.0643853
CL	150	2.36529	0.0634171
PF	415	6.5481	0.0633771
LPMR	592	9.5272	0.0621379
LGP	723	11.9881	0.06031
str	14	0.243826	0.057418
eml	101	1.78232	0.0566677
VL	523	9.37664	0.0557769
APTD	383	6.87466	0.0557118
LDDM	82	1.47426	0.0556211
VM	387	7.14033	0.0541992
pv	657	12.3768	0.0530832
Po	969	19.7222	0.0491326
VPM	945	20.2368	0.0466971
VPL	343	7.77032	0.0441423
Ang	5	0.115361	0.0433421
PC	93	2.25687	0.0412075
MGP	55	1.46938	0.0374308
MPT	16	0.43344	0.036914
ic	698	18.9136	0.0369047
PLi	8	0.218133	0.0366749
SubG	21	0.578605	0.0362942
Rt	192	5.33848	0.0359653
PVA	32	0.905676	0.0353327
STh	73	2.66873	0.0273539
Hypothalamus
Regions, nuclei and subnuclei	Lhcgr transcript count	Area (µm2, x 106)	Density (transcript/µm2, x 10-3)
PMD	42	0.118188	0.355367
VLPO	11	0.0454765	0.241883
CeC	210	1.16209	0.180709
ArcLP	207	1.29415	0.15995
AHP	108	0.735075	0.146924
PMV	93	0.636928	0.146013
MMn	46	0.343772	0.13381
Arc	49	0.456307	0.107384
AStr	361	3.41716	0.105643
mt	26	0.266693	0.0974905
ArcL	66	0.687543	0.095994
MePV	302	3.1926	0.0945936
CeL	172	1.82471	0.0942614
MM	227	2.41154	0.0941307
PH	959	10.3658	0.0925156
ACo	244	2.67952	0.0910612
ArcMP	113	1.25048	0.0903656
Te	40	0.449883	0.0889119
DMC	52	0.590681	0.088034
ML	126	1.46527	0.0859911
MCLH	37	0.438322	0.0844129
ArcD	16	0.190899	0.0838141
SubI	78	0.931883	0.0837015
CeMPV	135	1.63484	0.0825768
LM	36	0.43678	0.0824214
VMHDM	143	1.75072	0.0816808
DMV	145	1.78463	0.0812493
VMHVL	183	2.26072	0.0809476
LaDL	401	5.04327	0.0795119
ns	196	2.47012	0.0793484
BLA	695	8.87023	0.078352
PS	54	0.697563	0.0774123
LaVM	148	1.91438	0.0773096
DMD	128	1.65899	0.0771552
LaVL	168	2.2322	0.075262
SuMM	101	1.36609	0.0739334
AAD	97	1.31805	0.0735937
PMCo	1325	18.7705	0.0705895
MTu	93	1.3404	0.0693822
DM	247	3.58673	0.0688649
ZID	613	8.92187	0.0687075
BMA	314	4.58516	0.0684818
PeF	85	1.24148	0.0684665
VMHC	138	2.02666	0.0680924
AHiPM	433	6.39138	0.0677475
AHiAL	190	2.98835	0.0635803
MePD	273	4.37808	0.0623561
ZIV	637	10.4963	0.0606878
APir	494	8.61484	0.0573429
BLV	77	1.3553	0.0568139
PR	195	3.43566	0.0567577
BLP	436	7.78548	0.0560017
BMP	445	7.96738	0.0558527
CxA	176	3.32081	0.0529991
PSTh	71	1.36584	0.0519828
AAV	158	3.16383	0.0499395
SuML	25	0.503582	0.0496444
PLCo	485	9.99712	0.048514
LH	1040	23.8122	0.0436751
ZI	38	0.934709	0.0406544
TC	604	14.9785	0.0403245
ME	21	0.646948	0.0324601
FF	20	0.623311	0.0320867
cp	722	24.9096	0.0289849
opt	127	5.9808	0.0212346
Medulla
Regions, nuclei and subnuclei	Lhcgr transcript count	Area (µm2, x 106)	Density (transcript/µm2, x 10-3)
MVPO	10	0.0210682	0.474649
LVPO	9	0.0321162	0.280233
RPO	231	2.94287	0.0784948
vsc	41	0.55728	0.0735716
DLL	166	3.11347	0.0533167
ml	22	0.423677	0.0519264
PL	173	3.43874	0.0503091
RMg	29	0.58323	0.0497231
VLL	70	1.44548	0.0484267
ILL	70	1.66208	0.042116
Midbrain and pons
Regions, nuclei and subnuclei	Lhcgr transcript count	Area (µm2, x 106)	Density (transcript/µm2, x 10-3)
DT	99	0.318336	0.310993
DRC	25	0.100202	0.249495
IPI	248	1.29929	0.190873
IPDM	59	0.389762	0.151374
IF	69	0.48611	0.141943
IPR	375	2.679	0.139977
DRVL	71	0.51206	0.138656
IPC	198	1.48659	0.13319
MGV	863	7.01957	0.122942
DTgP	45	0.37486	0.120045
Min	9	0.0775927	0.11599
PCom	32	0.285962	0.111903
MZMG	148	1.32344	0.111829
3PC	36	0.325787	0.110502
PPT	45	0.412886	0.108989
lfp	133	1.23532	0.107665
IPL	132	1.23326	0.107033
MGD	320	3.00248	0.106579
DMPn	21	0.200405	0.104788
DRD	124	1.27694	0.0971072
Dk	108	1.19292	0.0905339
MGM	113	1.25895	0.089757
CLi	40	0.445773	0.0897319
SubB	231	2.72628	0.0847309
Pn	467	5.52861	0.0844697
DRV	82	0.98481	0.0832648
DLPAG	428	5.20642	0.0822062
Su3C	78	0.963485	0.0809561
RPF	61	0.756914	0.0805904
MnR	284	3.60909	0.0786903
PP	193	2.45316	0.078674
DMPAG	653	8.30576	0.0786202
PAG	457	5.85568	0.0780439
LPAG	1246	16.0879	0.0774495
DpWh	601	7.85562	0.0765058
MA3	45	0.600187	0.0749766
mlf	62	0.847096	0.0731912
VTg	18	0.247166	0.0728255
bic	273	3.78688	0.072091
SPTg	74	1.05058	0.070437
SNL	125	1.77692	0.0703463
bp	117	1.67235	0.0699613
VLPAG	361	5.20411	0.0693683
InCo	116	1.72888	0.0670955
PMnR	343	5.11701	0.0670314
VLTg	27	0.407233	0.0663011
BIC	296	4.5104	0.0656262
IPDL	64	0.976332	0.0655515
Op	887	13.7437	0.0645388
RtTg	218	3.4074	0.0639784
SuG	990	15.5288	0.0637525
PN	51	0.803418	0.0634788
MCPC	28	0.442176	0.0633233
ts	150	2.3712	0.0632591
InC	109	1.8093	0.0602444
LDTg	108	1.80185	0.0599385
ATg	41	0.685488	0.0598114
PBG	42	0.725055	0.0579267
3N	55	0.952437	0.0577466
InWh	1146	19.891	0.0576141
InCG	49	0.854033	0.0573748
SNC	239	4.21827	0.0566583
RtTgP	101	1.79722	0.0561979
ECIC	1042	18.772	0.0555081
pc	12	0.21839	0.0549476
Su3	50	0.921863	0.054238
RC	121	2.23888	0.0540448
RLi	156	2.89559	0.0538749
InG	1404	27.0714	0.0518629
DpG	1261	24.9733	0.050494
PPTg	228	4.64323	0.0491038
ml	346	7.19351	0.0480989
LPBC	84	1.74789	0.0480579
KF	17	0.364326	0.0466615
LPBS	62	1.35556	0.0457376
CnF	300	6.6591	0.0450512
Zo	361	8.0848	0.0446517
mtg	18	0.405692	0.0443687
VTA	411	9.31549	0.0441201
MiTG	157	3.62913	0.0432611
scp	186	4.31719	0.0430836
MPB	95	2.20754	0.0430344
RRF	52	1.25536	0.0414225
csc	41	1.00511	0.0407916
DpMe	4586	113.132	0.0405367
Sag	237	5.94381	0.0398734
DRI	19	0.510776	0.0371983
SPO	16	0.457334	0.0349853
RMC	261	7.47536	0.0349147
SNR	942	27.0215	0.0348611
Tz	17	0.503068	0.0337927
LPBE	31	0.934452	0.0331745
CIC	291	8.86689	0.0328187
RPC	219	6.75493	0.0324208
DMTg	88	2.74426	0.0320669
VTRZ	18	0.584257	0.0308083
EMi	70	2.31391	0.0302519
xscp	123	4.31282	0.0285196
RR	36	1.34888	0.0266888
SubCD	30	1.1996	0.0250083
PnO	707	29.0685	0.0243219
PnV	20	0.830653	0.0240774
Mo5	53	2.27871	0.0232588
PnC	176	7.75541	0.0226938
PBP	132	6.10516	0.0216211
DCIC	98	4.60109	0.0212993
LPBV	7	0.344028	0.0203472
Su5	36	1.77024	0.0203362
Pr5VL	37	2.27665	0.0162519
rs	11	0.682405	0.0161195
SubCV	27	2.18056	0.0123821
Pr5DM	8	0.797766	0.010028
IPF	2	0.753317	0.00265492
Hippocampus
Regions, nuclei and subnuclei	Lhcgr transcript count	Area (µm2, x 106)	Density (transcript/µm2, x 10-3)
GrDG	8351	26.0619	0.32043
Py	4171	46.9988	0.0887469
f	39	0.614061	0.0635116
PaS	296	6.11235	0.0484265
PrS	1244	31.7719	0.0391541
S	1198	45.9791	0.0260553
DG	750	29.4924	0.0254303
Mol	914	44.4796	0.0205487
PoDG	400	20.0156	0.0199844
CA2	48	2.47012	0.0194323
fi	195	12.7568	0.015286
LMol	699	47.1165	0.0148356
CA1	538	67.4617	0.0079749
Or	444	59.3967	0.00747516
CA3	157	22.8274	0.0068777
Rad	11	3.48859	0.00315314
Cereebral cortex
Regions, nuclei and subnuclei	Lhcgr transcript count	Area (µm2, x 106)	Density (transcript/µm2, x 10-3)
SL	110	0.997143	0.110315
VEn	251	3.6502	0.0687634
LEnt	5912	98.2601	0.0601669
MEnt	1064	18.1698	0.0585587
DEn	1198	23.0219	0.0520374
Pir	5035	100.696	0.0500018
IL	451	9.16955	0.0491845
CI	474	9.88048	0.0479734
AIV	656	15.3145	0.0428351
Ect	1589	38.2347	0.0415591
PRh	1256	32.1653	0.0390484
VO	559	15.2323	0.0366983
AIP	317	8.96221	0.0353707
DI	535	15.9073	0.0336324
DP	450	13.4474	0.0334636
AID	615	18.7584	0.0327853
S1FL	1076	33.0899	0.0325174
DLO	333	10.3409	0.0322022
LO	917	28.6291	0.0320303
MPtA	131	4.14633	0.0315942
S1DZ	180	5.81354	0.0309622
S1ULp	1316	43.4994	0.0302533
S1Tr	514	17.5257	0.0293284
LPtA	207	7.21201	0.0287021
V2MM	987	34.5377	0.0285774
S2	1590	55.8164	0.0284863
TeA	1114	39.5134	0.0281929
V2ML	418	15.8921	0.0263024
Cg1	697	27.2525	0.0255756
FrA	991	40.7631	0.0243112
S1HL	303	12.5644	0.0241158
RSA	1043	43.4265	0.0240176
PrL	405	17.1012	0.0236825
S1BF	2124	91.2837	0.0232681
RSG	1116	51.5182	0.0216622
Cg2	575	26.5799	0.0216329
S1J	538	25.6308	0.0209904
M1	2436	117.14	0.0207957
S1	846	41.7731	0.0202523
MO	260	12.9487	0.0200792
V1	2361	124.439	0.0189732
V2L	907	48.5029	0.0186999
AuV	447	24.526	0.0182256
M2	2084	117.303	0.017766
AuD	371	21.764	0.0170465
AI	399	24.6886	0.0161613
Au1	335	22.4639	0.0149128
