# Supplementary material for: Brain atlas for glycoprotein hormone receptors at single-transcript level
Source: eLife. 2022 Sep 2;11:e79612. doi: 10.7554/eLife.79612 (PMC9473692; doi:10.7554/eLife.79612)
Supplement: Figure 3—figure supplement 1—source data 1. [file elife-79612-fig3-figsupp1-data1.xlsx]

## Sheet: Sheet1
Figure 3-figure supplement 1-source data 1: Fshr transcript count in brain regions, nuclei and subnuclei
Tissues	Fshr transcript count
Whole thyroid	48576000
Sertoli cells	48576000
Whole brain	182598
Brain
Regions	Fshr transcript count
Ventricles	2009
Cerebellum	11343
Olfactory bulb	9682
Hippocampus	25962
Cerebral cortex	71940
Medulla	669
Midbrain & pons	19790
Forebrain	23223
Thalamus	9717
Hypothalamus	8263
Ventricular regions
Regions, nuclei and subnuclei	Fshr transcript count
3V	1386
SVZ	623
Cerebellum
Regions, nuclei and subnuclei	Fshr transcript count
PFI	867
Sim	7553
FI	1569
Ant	667
Crus1	627
mcp	60
Olfactory bulb
Regions, nuclei and subnuclei	Fshr transcript count
GrA	696
IPI	77
GrO	5619
MiA	72
AOE	229
GIA	31
Gl	3032
EPIA	163
AOV	202
AOL	716
AOD	370
AOP	289
AOM	433
DTT	217
AOB	33
Tu	785
EPI	278
VTT	69
LOT	8
lo	6
Hippocampus
Regions, nuclei and subnuclei	Fshr transcript count
GrDG	10571
Py	6053
FC	10
f	113
dhc	353
CA2	234
PaS	98
fi	642
CA1	1699
PoDG	579
DG	827
Or	1628
PrS	847
Mol	808
LMol	670
S	558
CA3	272
Cerebral cortex
Regions, nuclei and subnuclei	Fshr transcript count
AIV	867
MEnt	695
AID	936
DP	285
DI	934
V2MM	2349
V2ML	1874
PRh	2290
S1ULp	1926
LEnt	7309
TeA	2292
AuD	1592
AuV	1961
Ect	2438
LO	1134
RSA	2921
V2L	2715
S1Tr	1834
Au1	1566
FrA	585
Pir	5481
MO	564
VO	614
MPtA	210
S2	2724
AIP	478
S1DZ	344
DEn	200
Cg/RS	148
V1	4895
AI	1222
IL	128
S1	893
PrL	478
RSG	2482
CI	78
S1HL	568
M1	3450
S1FL	1187
Cg1	649
LPtA	232
M2	2821
Cg2	599
S1BF	2854
S1J	138
Medulla
Regions, nuclei and subnuclei	Fshr transcript count
RMg	6
DLL	58
VLL	101
RPO	165
ILL	87
Pr5	90
PL	157
MVPO	3
LVPO	2
Thalamus
Regions, nuclei and subnuclei	Fshr transcript count
MHb	785
SCO	12
LHbM	158
Xi	1
aca	526
PV	247
STh	44
LHb	218
LHbL	131
PrC	45
acp	39
PIL	105
Re	68
APT	203
VLG	37
MDL	288
SG	32
Sub	88
VLGPC	31
Rh	30
LPLC	20
PF	212
CM	161
IMD	155
VPL	305
LPLR	108
MGP	106
SPF	22
PoT	150
VM	388
Rt	238
MDC	197
IGL	18
VLGMC	30
PLi	40
OPC	5
LPMR	264
pv	270
MDM	278
fr	15
Ang	30
APTD	168
VPM	690
PC	107
LGP	398
Po	721
LDDM	123
LDVL	194
LPMC	32
CL	106
ic	662
DLG	109
VRe	4
SubG	2
VL	286
PVA	8
OPT	1
PPT	1
MPT	1
APTV	4
Midbrain and pons
Regions, nuclei and subnuclei	Fshr transcript count
IPDL	51
Su3C	137
DRVL	93
3PC	46
IPR	66
IF	18
EMi	27
InC	45
3N	54
DMPAG	442
LDTg	20
MiTG	87
Su3	67
InCG	45
PN	93
PPT	90
VTg	35
DRV	16
RC	27
OT	20
MA3	6
IPI	51
Dk	41
PBG	16
IPL	38
InG	1643
DpWh	339
Pn	497
DRD	85
SuG	520
InWh	1317
MnR	148
VLTg	65
DLPAG	302
InCo	185
BIC	287
MGV	436
ECIC	889
PMnR	194
PP	154
DpG	1028
RRF	67
CnF	194
RR	33
LPAG	766
Op	767
DR	118
MGM	36
RLi	116
KF	14
IP	7
PPTg	144
VLPAG	177
scp	59
SNL	83
VTRZ	27
ml	216
RPF	6
RtTg	80
DRI	10
MGD	167
DT	6
rs	27
IPC	52
RMC	327
RPC	313
SNC	136
PnO	1130
IPF	23
xscp	29
SC	77
SPTg	26
VTA	451
SubB	77
R	10
SNR	770
Sag	22
PAG	222
DpMe	3148
CLi	29
lfp	31
ts	22
mlf	8
PBP	34
ATg	4
bp	7
PCom	2
Forebrain
Regions, nuclei and subnuclei	Fshr transcript count
aci	184
ac	28
VMPO	155
Ld	127
BSTMPI	173
MnPO	95
BSTLI	79
TS	55
ADP	26
BSTLP	128
VOLT	20
SHy	100
BST	198
SHi	52
AVPe	17
BSTMV	41
BSTMA	166
LSV	567
MPOC	8
BSTLD	91
MS	352
VDB	301
MPOL	119
LAcbSh	236
IPACL	225
AcbC	1094
IPACM	105
AcbSh	948
HDB	389
MPOM	153
BSTMPM	107
LSI	1591
fmi	150
LPO	671
BSTMPL	18
BSTLV	29
VP	1324
MCPO	174
MPA	718
CPu	11413
LSD	193
Acb	152
SI	170
SFO	37
st	108
SFi	126
BSTIA	10
Hypothalamus
Regions, nuclei and subnuclei	Fshr transcript count
ArcL	124
DMC	75
ArcD	30
Arc	22
CeMPV	88
DMV	150
ns	37
ArcLP	34
DMD	173
BLV	85
FF	31
VMHDM	175
VMHVL	193
AHiAL	90
CeL	132
ME	46
Te	14
PeF	76
AHiPM	107
VMHC	182
CeC	87
PMV	13
APir	432
BMA	257
PLCo	312
PR	56
LaDL	156
ZIV	221
MTu	62
MePD	263
AHP	50
DM	247
PSTh	18
ArcMP	38
MePV	254
PH	233
cp	557
ACo	154
LH	665
LaVM	43
MCLH	35
ZI	34
ML	91
BMP	200
PMD	10
BLP	112
BLA	274
LaVL	85
MM	215
TC	326
ZID	209
AStr	76
CxA	59
PMCo	442
AAD	47
AAV	37
SuMM	3
SuM	21
MMn	2
SuML	3
