# Supplementary material for: Brain atlas for glycoprotein hormone receptors at single-transcript level
Source: eLife. 2022 Sep 2;11:e79612. doi: 10.7554/eLife.79612 (PMC9473692; doi:10.7554/eLife.79612)
Supplement: Figure 3—source data 1. [file elife-79612-fig3-data1.xlsx]

## Sheet: Sheet1
Figure 3-source data 1: Fshr density in brain regions, nuclei and subnuclei
Tissues	Fshr transcript count	Area (µm2, x 106)	Density (transcript/µm2, x 10-3)
Whole thyroid	48576000	137399	0.353541
Sertoli cells	48576000	85874.2	0.565665
Whole brain	182598	3693.58	0.0494366
Brain
Regions	Fshr transcript count	Area (µm2, x 106)	Density (transcript/µm2, x 10-3)
Ventricles	2009	3.03939	0.660988
Cerebellum	11343	45.3271	0.250248
Olfactory bulb	9682	78.4641	0.123394
Hippocampus	25962	314.689	0.0825004
Cerebral cortex	71940	1156.06	0.0622284
Medulla	669	11.8846	0.0562914
Midbrain & pons	19790	391.46	0.0505544
Forebrain	23223	500.127	0.0464342
Thalamus	9717	220.973	0.0439737
Hypothalamus	8263	191.574	0.0431322
Ventricular regions
Regions, nuclei and subnuclei	Fshr transcript count	Area (µm2, x 106)	Density (transcript/µm2, x 10-3)
3V	1386	0.755253	1.83515
SVZ	623	2.28414	0.272751
Cerebellum
Regions, nuclei and subnuclei	Fshr transcript count	Area (µm2, x 106)	Density (transcript/µm2, x 10-3)
PFI	867	1.70814	0.507568
Sim	7553	20.2191	0.373558
FI	1569	8.44646	0.185758
Ant	667	3.78002	0.176454
Crus1	627	8.4846	0.0738986
mcp	60	2.68881	0.0223147
Olfactory bulb
Regions, nuclei and subnuclei	Fshr transcript count	Area (µm2, x 106)	Density (transcript/µm2, x 10-3)
GrA	696	0.44528	1.56306
IPI	77	0.144634	0.532379
GrO	5619	11.3713	0.494138
MiA	72	0.184999	0.389191
AOE	229	0.798147	0.286915
GIA	31	0.115062	0.269419
Gl	3032	15.1695	0.199874
EPIA	163	1.2783	0.127513
AOV	202	1.59638	0.126537
AOL	716	5.79326	0.123592
AOD	370	3.23052	0.114533
AOP	289	2.90511	0.09948
AOM	433	5.03884	0.0859325
DTT	217	2.97727	0.0728855
AOB	33	0.506748	0.0651212
Tu	785	16.2255	0.0483807
EPI	278	7.22383	0.0384837
VTT	69	2.20846	0.0312435
LOT	8	0.441457	0.0181218
lo	6	0.809462	0.00741233
Hippocampus
Regions, nuclei and subnuclei	Fshr transcript count	Area (µm2, x 106)	Density (transcript/µm2, x 10-3)
GrDG	10571	19.0022	0.556303
Py	6053	27.3647	0.221197
FC	10	0.0716743	0.13952
f	113	1.02113	0.110662
dhc	353	3.43741	0.102694
CA2	234	3.52541	0.0663753
PaS	98	1.60399	0.0610978
fi	642	13.0286	0.0492761
CA1	1699	35.8829	0.0473484
PoDG	579	13.3976	0.0432167
DG	827	19.9599	0.041433
Or	1628	49.171	0.0331089
PrS	847	25.6962	0.032962
Mol	808	27.6227	0.0292513
LMol	670	27.4434	0.0244139
S	558	28.077	0.0198739
CA3	272	18.3834	0.0147959
Cerebral cortex
Regions, nuclei and subnuclei	Fshr transcript count	Area (µm2, x 106)	Density (transcript/µm2, x 10-3)
AIV	867	6.04613	0.143398
MEnt	695	5.14641	0.135045
AID	936	7.37571	0.126903
DP	285	2.31254	0.123241
DI	934	7.70217	0.121265
V2MM	2349	20.168	0.116472
V2ML	1874	16.6404	0.112618
PRh	2290	21.8234	0.104933
S1ULp	1926	19.4543	0.0990014
LEnt	7309	76.3209	0.0957667
TeA	2292	24.7751	0.0925123
AuD	1592	17.398	0.0915046
AuV	1961	21.6551	0.0905562
Ect	2438	27.2174	0.0895751
LO	1134	12.6893	0.0893666
RSA	2921	35.2387	0.0828917
V2L	2715	33.3262	0.0814675
S1Tr	1834	23.448	0.0782156
Au1	1566	20.8813	0.0749954
FrA	585	8.52678	0.0686074
Pir	5481	86.2064	0.06358
MO	564	8.95373	0.0629905
VO	614	9.77643	0.0628041
MPtA	210	3.573	0.0587741
S2	2724	47.5393	0.0572999
AIP	478	8.51767	0.0561186
S1DZ	344	6.25781	0.0549713
DEn	200	3.71825	0.0537887
Cg/RS	148	2.97867	0.0496867
V1	4895	102.93	0.0475568
AI	1222	25.7352	0.0474837
IL	128	2.74373	0.0466519
S1	893	19.353	0.0461427
PrL	478	10.7428	0.0444951
RSG	2482	56.2208	0.0441474
CI	78	1.82502	0.0427392
S1HL	568	13.8413	0.0410367
M1	3450	84.4044	0.0408747
S1FL	1187	30.9744	0.038322
Cg1	649	17.2398	0.0376455
LPtA	232	6.25335	0.0371001
M2	2821	78.8478	0.0357778
Cg2	599	19.5802	0.0305922
S1BF	2854	94.9798	0.0300485
S1J	138	4.72615	0.0291993
Medulla
Regions, nuclei and subnuclei	Fshr transcript count	Area (µm2, x 106)	Density (transcript/µm2, x 10-3)
RMg	6	0.0672683	0.089195
DLL	58	0.723004	0.0802208
VLL	101	1.38946	0.0726899
RPO	165	2.41685	0.0682707
ILL	87	1.50471	0.0578186
Pr5	90	1.60634	0.0560279
PL	157	3.77908	0.0415444
MVPO	3	0.173727	0.0172685
LVPO	2	0.224134	0.00892322
Thalamus
Regions, nuclei and subnuclei	Fshr transcript count	Area (µm2, x 106)	Density (transcript/µm2, x 10-3)
MHb	785	2.78123	0.28225
SCO	12	0.0513064	0.233889
LHbM	158	1.3141	0.120234
Xi	1	0.00851885	0.117387
aca	526	4.8099	0.109358
PV	247	2.3634	0.10451
STh	44	0.428828	0.102605
LHb	218	2.14386	0.101686
LHbL	131	1.42158	0.0921508
PrC	45	0.526504	0.0854695
acp	39	0.491493	0.0793501
PIL	105	1.34139	0.0782773
Re	68	1.02504	0.0663386
APT	203	3.16272	0.0641852
VLG	37	0.627223	0.0589902
MDL	288	4.90666	0.0586957
SG	32	0.549046	0.058283
Sub	88	1.52731	0.0576178
VLGPC	31	0.548534	0.0565143
Rh	30	0.540369	0.0555176
LPLC	20	0.378295	0.0528688
PF	212	4.07243	0.0520574
CM	161	3.18146	0.0506057
IMD	155	3.14957	0.0492131
VPL	305	6.37206	0.0478652
LPLR	108	2.2897	0.0471677
MGP	106	2.25403	0.0470268
SPF	22	0.493826	0.0445501
PoT	150	3.48542	0.0430364
VM	388	9.11705	0.0425576
Rt	238	5.66822	0.0419885
MDC	197	4.95419	0.0397643
IGL	18	0.478115	0.0376478
VLGMC	30	0.798746	0.0375589
PLi	40	1.06623	0.0375152
OPC	5	0.13329	0.0375121
LPMR	264	7.11	0.0371308
pv	270	7.2969	0.037002
MDM	278	7.66407	0.0362731
fr	15	0.41361	0.036266
Ang	30	0.85613	0.0350414
APTD	168	4.818	0.0348693
VPM	690	19.9039	0.0346665
PC	107	3.11953	0.0343
LGP	398	11.6116	0.034276
Po	721	21.0384	0.0342706
LDDM	123	3.78184	0.0325238
LDVL	194	6.2363	0.0311082
LPMC	32	1.09346	0.0292648
CL	106	3.65632	0.0289909
ic	662	22.9818	0.0288054
DLG	109	3.9681	0.0274691
VRe	4	0.152489	0.0262314
SubG	2	0.0771818	0.0259129
VL	286	13.6381	0.0209707
PVA	8	0.611927	0.0130734
OPT	1	0.153977	0.00649448
PPT	1	0.158721	0.00630036
MPT	1	0.303422	0.00329573
APTV	4	1.8655	0.00214419
Midbrain and pons
Regions, nuclei and subnuclei	Fshr transcript count	Area (µm2, x 106)	Density (transcript/µm2, x 10-3)
IPDL	51	0.133392	0.382333
Su3C	137	0.766854	0.178652
DRVL	93	0.574274	0.161944
3PC	46	0.337999	0.136095
IPR	66	0.505026	0.130686
IF	18	0.158863	0.113305
EMi	27	0.243401	0.110928
InC	45	0.43878	0.102557
3N	54	0.532971	0.101319
DMPAG	442	4.49497	0.0983322
LDTg	20	0.205312	0.0974125
MiTG	87	0.916229	0.0949544
Su3	67	0.717569	0.0933708
InCG	45	0.4937	0.0911484
PN	93	1.04155	0.0892899
PPT	90	1.01303	0.0888428
VTg	35	0.40448	0.0865309
DRV	16	0.185302	0.0863456
RC	27	0.317549	0.0850263
OT	20	0.24456	0.0817794
MA3	6	0.0758291	0.0791253
IPI	51	0.648905	0.078594
Dk	41	0.525373	0.0780398
PBG	16	0.213351	0.0749937
IPL	38	0.510197	0.074481
InG	1643	22.0893	0.0743798
DpWh	339	4.59771	0.0737324
Pn	497	6.82947	0.0727729
DRD	85	1.16862	0.0727356
SuG	520	7.19793	0.072243
InWh	1317	18.6404	0.0706531
MnR	148	2.11234	0.0700644
VLTg	65	0.929321	0.0699435
DLPAG	302	4.32007	0.0699062
InCo	185	2.72	0.0680147
BIC	287	4.23399	0.0677847
MGV	436	6.43451	0.0677596
ECIC	889	13.3237	0.0667232
PMnR	194	2.99198	0.06484
PP	154	2.39708	0.0642449
DpG	1028	16.2385	0.0633062
RRF	67	1.07934	0.0620752
CnF	194	3.1308	0.061965
RR	33	0.544408	0.0606163
LPAG	766	12.6727	0.0604449
Op	767	12.704	0.0603748
DR	118	1.96199	0.060143
MGM	36	0.61701	0.0583459
RLi	116	2.01439	0.0575857
KF	14	0.249469	0.0561193
IP	7	0.125329	0.0558532
PPTg	144	2.58835	0.0556338
VLPAG	177	3.19097	0.0554689
scp	59	1.06369	0.0554671
SNL	83	1.49791	0.0554104
VTRZ	27	0.487816	0.0553487
ml	216	3.98779	0.0541654
RPF	6	0.111415	0.0538527
RtTg	80	1.53538	0.0521042
DRI	10	0.192925	0.0518335
MGD	167	3.42575	0.0487485
DT	6	0.123328	0.0486506
rs	27	0.568225	0.0475164
IPC	52	1.10086	0.0472356
RMC	327	6.98131	0.0468393
RPC	313	6.71172	0.0466348
SNC	136	2.92619	0.0464769
PnO	1130	26.1683	0.0431821
IPF	23	0.550582	0.041774
xscp	29	0.717584	0.0404134
SC	77	1.9319	0.0398571
SPTg	26	0.668712	0.0388807
VTA	451	11.7015	0.0385422
SubB	77	2.0619	0.0373443
R	10	0.279354	0.0357969
SNR	770	23.0151	0.0334563
Sag	22	0.67508	0.0325888
PAG	222	7.30705	0.0303816
DpMe	3148	106.885	0.0294523
CLi	29	0.989005	0.0293224
lfp	31	1.11791	0.0277304
ts	22	0.794698	0.0276835
mlf	8	0.330341	0.0242174
PBP	34	1.58577	0.0214407
ATg	4	0.21395	0.0186959
bp	7	0.685602	0.01021
PCom	2	0.263199	0.00759882
Forebrain
Regions, nuclei and subnuclei	Fshr transcript count	Area (µm2, x 106)	Density (transcript/µm2, x 10-3)
aci	184	0.370683	0.496381
ac	28	0.0619734	0.451806
VMPO	155	0.391162	0.396255
Ld	127	0.55321	0.229569
BSTMPI	173	1.05571	0.16387
MnPO	95	0.644064	0.147501
BSTLI	79	0.579533	0.136317
TS	55	0.45567	0.120701
ADP	26	0.217748	0.119404
BSTLP	128	1.22541	0.104455
VOLT	20	0.201902	0.0990581
SHy	100	1.02923	0.0971601
BST	198	2.11563	0.0935892
SHi	52	0.557732	0.0932348
AVPe	17	0.199249	0.0853202
BSTMV	41	0.493098	0.0831477
BSTMA	166	2.02113	0.0821324
LSV	567	6.98901	0.0811274
MPOC	8	0.105279	0.0759882
BSTLD	91	1.25109	0.0727365
MS	352	4.8477	0.0726117
VDB	301	4.30228	0.0699628
MPOL	119	1.7061	0.0697499
LAcbSh	236	3.47242	0.0679642
IPACL	225	3.46492	0.0649365
AcbC	1094	17.3876	0.0629184
IPACM	105	1.67766	0.0625873
AcbSh	948	15.6333	0.0606398
HDB	389	6.91473	0.0562567
MPOM	153	2.85493	0.0535915
BSTMPM	107	2.00592	0.053342
LSI	1591	31.5305	0.0504591
fmi	150	3.07607	0.0487635
LPO	671	13.914	0.0482247
BSTMPL	18	0.377793	0.0476452
BSTLV	29	0.611668	0.0474113
VP	1324	28.2545	0.0468598
MCPO	174	3.76915	0.0461642
MPA	718	17.8347	0.0402587
CPu	11413	290.084	0.0393437
LSD	193	5.32288	0.0362585
Acb	152	4.32048	0.0351813
SI	170	5.42956	0.0313101
SFO	37	1.26446	0.0292614
st	108	3.95349	0.0273177
SFi	126	5.12714	0.0245751
BSTIA	10	0.470279	0.021264
Hypothalamus
Regions, nuclei and subnuclei	Fshr transcript count	Area (µm2, x 106)	Density (transcript/µm2, x 10-3)
ArcL	124	0.830324	0.149339
DMC	75	0.532485	0.140849
ArcD	30	0.261889	0.114552
Arc	22	0.222472	0.0988886
CeMPV	88	0.93421	0.0941972
DMV	150	1.69886	0.0882944
ns	37	0.445563	0.0830409
ArcLP	34	0.409755	0.0829764
DMD	173	2.14544	0.0806363
BLV	85	1.07719	0.0789093
FF	31	0.430162	0.0720659
VMHDM	175	2.48934	0.0702997
VMHVL	193	2.85639	0.0675678
AHiAL	90	1.33924	0.0672023
CeL	132	2.03475	0.0648729
ME	46	0.729797	0.0630313
Te	14	0.231053	0.0605923
PeF	76	1.26191	0.0602263
AHiPM	107	1.78738	0.059864
VMHC	182	3.07728	0.0591432
CeC	87	1.47548	0.0589637
PMV	13	0.221091	0.0587994
APir	432	7.66636	0.0563501
BMA	257	4.75541	0.0540437
PLCo	312	5.89677	0.0529104
PR	56	1.05921	0.0528696
LaDL	156	3.03424	0.0514132
ZIV	221	4.31653	0.0511986
MTu	62	1.25758	0.049301
MePD	263	5.38848	0.0488078
AHP	50	1.0303	0.0485295
DM	247	5.16805	0.0477937
PSTh	18	0.381938	0.0471281
ArcMP	38	0.819172	0.0463883
MePV	254	5.56287	0.0456598
PH	233	5.15157	0.0452289
cp	557	12.7273	0.043764
ACo	154	3.57225	0.0431101
LH	665	16.022	0.0415053
LaVM	43	1.05406	0.0407947
MCLH	35	0.896402	0.039045
ZI	34	0.882885	0.0385101
ML	91	2.38653	0.0381307
BMP	200	5.37281	0.0372245
PMD	10	0.273711	0.0365349
BLP	112	3.11326	0.0359751
BLA	274	7.83264	0.0349818
LaVL	85	2.47468	0.0343479
MM	215	6.65408	0.032311
TC	326	11.2307	0.0290276
ZID	209	7.64923	0.027323
AStr	76	2.79027	0.0272375
CxA	59	2.36986	0.024896
PMCo	442	18.4183	0.0239978
AAD	47	2.29112	0.020514
AAV	37	2.56312	0.0144355
SuMM	3	0.216588	0.0138512
SuM	21	1.66814	0.0125889
MMn	2	0.401069	0.00498668
SuML	3	0.732299	0.00409669
