# Supplementary material for: Brain atlas for glycoprotein hormone receptors at single-transcript level
Source: eLife. 2022 Sep 2;11:e79612. doi: 10.7554/eLife.79612 (PMC9473692; doi:10.7554/eLife.79612)
Supplement: Figure 4—source data 1. [file elife-79612-fig4-data1.xlsx]

## Sheet: Frontal
Figure 4-source data 1: FSHR expression in the frontal cortex of AD and non-AD human brains
Area	Age	Condition	Sex	Array_ID	log2(FSHR_FrLobe)		Area	Age	Condition	Sex	Array_ID	log2(FSHR_FrLobe)
BM10	73	AD	F	57028hg133a11.cel	0.614006		BM10	62	NL	F	50321hg133a11.cel	-0.201241
BM10	79	AD	F	50409hg133a11.cel	0.0862622		BM10	82	NL	F	50349hg133a11.cel	0.15834
BM10	83	AD	F	50373hg133a11.cel	0.169528		BM10	83	NL	F	37289hg133a11.cel	0.131906
BM10	84	AD	F	34843hg133a11.cel	-0.0876079		BM10	85	NL	F	34888hg133a11.cel	-0.386481
BM10	84	AD	F	34846hg133a11.cel	0.165126		BM10	86	NL	F	37267hg133a11.cel	0.0354152
BM10	85	AD	F	34999hg133a11.cel	0.0848422		BM10	89	NL	F	34975hg133a11.cel	-0.178305
BM10	86	AD	F	37222hg133a11.cel	-0.340101		BM10	96	NL	F	34822hg133a11.cel	-0.221588
BM10	87	AD	F	34855hg133a11.cel	-0.295184		BM10	102	NL	F	34900hg133a11.cel	-0.0581751
BM10	87	AD	F	37257hg133a11.cel	-0.278499		BM10	60	NL	M	50326hg133a21.cel	0.201376
BM10	88	AD	F	50425hg133a11.cel	0.688602		BM10	69	NL	M	34879hg133a11.cel	0.192097
BM10	89	AD	F	34891hg133a11.cel	-0.113284		BM10	69	NL	M	37303hg133a11.cel	-0.429481
BM10	90	AD	F	35002hg133a11.cel	-0.221333		BM10	70	NL	M	34960hg133a11.cel	-0.21785
BM10	90	AD	F	50389hg133a11.cel	0.370143		BM10	85	NL	M	50331hg133a11.cel	-0.0681953
BM10	90	AD	F	50401hg133a11.cel	0.049798		BM10	95	NL	M	34969hg133a11.cel	0.00133276
BM10	91	AD	F	37227hg133a21.cel	-0.176433		BM4	86	NL	F	48096hg133a11.cel	0.108629
BM10	92	AD	F	50449hg133a11.cel	0.233139		BM4	89	NL	F	48119hg133a11.cel	-0.0542312
BM10	93	AD	F	45415hg133a11.cel	0.142786		BM4	90	NL	F	35048hg133a11.cel	-0.13809
BM10	93	AD	F	58590hg133a11.cel	0.0526533		BM4	96	NL	F	57667hg133a11.cel	0.133022
BM10	95	AD	F	34972hg133a11.cel	-0.369505		BM4	69	NL	M	51164hg133a11.cel	0.270192
BM10	95	AD	F	37262hg133a11.cel	-0.0282497		BM4	85	NL	M	57659hg133a11.cel	-0.219944
BM10	99	AD	F	58660hg133a11.cel	0.0278177		BM44	82	NL	F	35105hg133a11.cel	-0.0442862
BM10	64	AD	M	34837hg133a11.cel	0.160386		BM44	83	NL	F	35207hg133a21.cel	-0.309914
BM10	80	AD	M	50457hg133a11.cel	-0.0793028		BM44	85	NL	F	35111hg133a51.cel	-0.0461721
BM10	83	AD	M	58688hg133a11.cel	-0.121938		BM44	86	NL	F	35132hg133a21.cel	-0.0412641
BM10	85	AD	M	102802hg133a11.cel	-0.0430875		BM44	89	NL	F	35198hg133a11.cel	-0.0566282
BM10	87	AD	M	34966hg133a11.cel	-0.345187		BM44	96	NL	F	35045hg133a11.cel	-0.234665
BM10	88	AD	M	50381hg133a11.cel	0.386834		BM44	102	NL	F	35123hg133a31.cel	-0.0711737
BM10	92	AD	M	34834hg133a21.cel	0.0460381		BM44	69	NL	M	35102hg133a21.cel	-0.298944
BM10	100	AD	M	58681hg133a11.cel	0.0554895		BM44	70	NL	M	35183hg133a11.cel	-0.0694447
BM4	72	AD	F	101364hg133a11.cel	0.0209384		BM44	74	NL	M	35237hg133a31.cel	0.0579128
BM4	79	AD	F	48030hg133a11.cel	0.124799		BM44	95	NL	M	35192hg133a11.cel	0.0631118
BM4	83	AD	F	57658hg133a11.cel	0.0951567		BM46	62	NL	F	50325hg133a11.cel	-0.127196
BM4	84	AD	F	48065hg133a21.cel	-0.129322		BM46	82	NL	F	32167hg133a11.cel	0.294289
BM4	85	AD	F	48129hg133a11.cel	0.262265		BM46	83	NL	F	45420hg133a11.cel	-0.344777
BM4	86	AD	F	48050hg133a11.cel	0.185506		BM46	85	NL	F	32172hg133a21.cel	0.151449
BM4	87	AD	F	48067hg133a11.cel	-0.0510917		BM46	86	NL	F	32198hg133a21.cel	0.26258
BM4	87	AD	F	48079hg133a11.cel	0.437337		BM46	89	NL	F	51953hg133a11.cel	-0.032196
BM4	89	AD	F	48086hg133a21.cel	-0.269956		BM46	90	NL	F	49802hg133a11.cel	-0.00490809
BM4	90	AD	F	108463hg133a11.cel	0.660306		BM46	96	NL	F	45466hg133a11.cel	-0.0917363
BM4	90	AD	F	48131hg133a11.cel	0.324718		BM46	102	NL	F	26009hg133a11.cel	-0.20155
BM4	91	AD	F	48054hg133a11.cel	-0.0466704		BM46	60	NL	M	50330hg133a11.cel	0.400195
BM4	92	AD	F	48044hg133a11.cel	-0.0291862		BM46	66	NL	M	32497hg133a11.cel	0.319633
BM4	93	AD	F	48127hg133a11.cel	0.293979		BM46	69	NL	M	26005hg133a11.cel	-0.16462
BM4	93	AD	F	59042hg133a11.cel	0.147348		BM46	69	NL	M	32525hg133a11.cel	0.144151
BM4	94	AD	F	57580hg133a11.cel	-0.24752		BM46	70	NL	M	32469hg133a11.cel	-0.159522
BM4	95	AD	F	48090hg133a11.cel	0.202167		BM46	74	NL	M	51954hg133a11.cel	-0.145828
BM4	95	AD	F	48117hg133a11.cel	0.181345		BM46	85	NL	M	50335hg133a11.cel	0.124464
BM4	80	AD	M	48069hg133a11.cel	0.200067		BM46	95	NL	M	32477hg133a11.cel	0.0344558
BM4	83	AD	M	59082hg133a11.cel	0.27786		BM8	74	NL	F	19527hg133a11.cel	-0.140119
BM4	85	AD	M	108480hg133a11.cel	-0.0538268		BM8	83	NL	F	34790hg133a11.cel	0.00742674
BM4	87	AD	M	48073hg133a31.cel	0.142023		BM8	86	NL	F	19814hg133a11.cel	0.00643826
BM4	87	AD	M	48114hg133a21.cel	0.534922		BM8	89	NL	F	33489hg133a11.cel	-0.327502
BM4	88	AD	M	48022hg133a11.cel	0.0873289		BM8	90	NL	F	50348hg133a11.cel	0.229338
BM4	89	AD	M	48094hg133a11.cel	0.266056		BM8	96	NL	F	25514hg133a11.cel	-0.0336418
BM4	92	AD	M	48061hg133a11.cel	0.358901		BM8	102	NL	F	19778hg133a11.cel	-0.0271201
BM4	96	AD	M	108446hg133a11.cel	0.0599794		BM8	66	NL	M	34793hg133a11.cel	0.0303087
BM44	79	AD	F	50482hg133a11.cel	-0.0895495		BM8	69	NL	M	19706hg133a11.cel	0.0800486
BM44	84	AD	F	35066hg133a11.cel	0.0186033		BM8	69	NL	M	34805hg133a11.cel	-0.0499744
BM44	84	AD	F	35084hg133a11.cel	-0.110116		BM8	70	NL	M	33470hg133a11.cel	-0.180892
BM44	85	AD	F	35222hg133a11.cel	0.0534124		BM8	95	NL	M	33482hg133a11.cel	-0.115756
BM44	86	AD	F	35033hg133a21.cel	0.0519061
BM44	87	AD	F	35078hg133a11.cel	-0.0919404
BM44	87	AD	F	35099hg133a11.cel	0.0156479
BM44	89	AD	F	35114hg133a21.cel	-0.504479
BM44	90	AD	F	35093hg133a11.cel	0.178569
BM44	90	AD	F	50480hg133a11.cel	0.790791
BM44	91	AD	F	108634hg133a11.cel	-0.02948
BM44	91	AD	F	45467hg133a11.cel	0.236915
BM44	92	AD	F	50492hg133a11.cel	-0.0589185
BM44	93	AD	F	59047hg133a11.cel	-0.0378623
BM44	94	AD	F	45469hg133a11.cel	0.0513864
BM44	95	AD	F	35120hg133a21.cel	-0.121725
BM44	99	AD	F	59077hg133a11.cel	0.0438309
BM44	64	AD	M	35060hg133a11.cel	-0.53873
BM44	80	AD	M	35081hg133a11.cel	-0.135159
BM44	80	AD	M	50494hg133a11.cel	0.189137
BM44	83	AD	M	59087hg133a11.cel	0.0216861
BM44	87	AD	M	35087hg133a11.cel	0.132421
BM44	87	AD	M	35189hg133a11.cel	-0.0346136
BM44	89	AD	M	35129hg133a11.cel	-0.161592
BM46	79	AD	F	50413hg133a11.cel	-0.0647721
BM46	83	AD	F	50377hg133a11.cel	0.096478
BM46	84	AD	F	32144hg133a11.cel	0.269547
BM46	84	AD	F	37340hg133a11.cel	-0.449537
BM46	85	AD	F	32509hg133a11.cel	-0.0809979
BM46	86	AD	F	32098hg133a21.cel	-0.0512376
BM46	87	AD	F	32159hg133a11.cel	0.217992
BM46	87	AD	F	41881hg133a11.cel	-0.0850873
BM46	90	AD	F	32151hg133a31.cel	0.182506
BM46	90	AD	F	37214hg133a11.cel	0.181663
BM46	90	AD	F	50393hg133a11.cel	-0.162589
BM46	91	AD	F	32107hg133a11.cel	0.0545311
BM46	92	AD	F	50453hg133a11.cel	-0.276705
BM46	93	AD	F	32507hg133a11.cel	-0.242688
BM46	93	AD	F	59048hg133a11.cel	-0.00534201
BM46	94	AD	F	32100hg133a21.cel	-0.337905
BM46	95	AD	F	32182hg133a11.cel	0.0184021
BM46	95	AD	F	32481hg133a11.cel	0.173131
BM46	99	AD	F	59078hg133a11.cel	0.126875
BM46	64	AD	M	45459hg133a11.cel	-0.00115347
BM46	73	AD	M	50421hg133a11.cel	0.0108795
BM46	87	AD	M	32146hg133a11.cel	0.333136
BM46	87	AD	M	32475hg133a11.cel	-0.232056
BM46	88	AD	M	50385hg133a11.cel	-0.0143356
BM46	89	AD	M	50342hg133a11.cel	-0.0211382
BM8	79	AD	F	51232hg133a11.cel	0.240934
BM8	83	AD	F	19606hg133a41.cel	0.258774
BM8	84	AD	F	19586hg133a21.cel	0.263685
BM8	84	AD	F	19594hg133a11.cel	-0.0481501
BM8	84	AD	F	19666hg133a21.cel	-0.117312
BM8	85	AD	F	33509hg133a11.cel	-0.13992
BM8	86	AD	F	19496hg133a11.cel	-0.378487
BM8	87	AD	F	19610hg133a11.cel	-0.210069
BM8	87	AD	F	45447hg133a11.cel	-0.273196
BM8	88	AD	F	51250hg133a11.cel	0.510032
BM8	89	AD	F	19746hg133a11.cel	0.0275869
BM8	90	AD	F	34799hg133a11.cel	-0.242575
BM8	91	AD	F	25513hg133a11.cel	-0.249586
BM8	93	AD	F	34796hg133a11.cel	0.102444
BM8	93	AD	F	59044hg133a11.cel	-0.13142
BM8	94	AD	F	45470hg133a11.cel	-0.0733585
BM8	95	AD	F	33450hg133a11.cel	0.113498
BM8	95	AD	F	45421hg133a11.cel	-0.197069
BM8	99	AD	F	59074hg133a11.cel	0.0287309
BM8	62	AD	M	19646hg133a21.cel	0.339755
BM8	64	AD	M	19566hg133a11.cel	0.319042
BM8	74	AD	M	41890hg133a11.cel	0.0623488
BM8	80	AD	M	19650hg133a11.cel	-0.208581
BM8	80	AD	M	51278hg133a11.cel	0.259947
BM8	83	AD	M	59084hg133a11.cel	0.0627699
BM8	87	AD	M	19670hg133a21.cel	-0.0561657
BM8	87	AD	M	33478hg133a11.cel	-0.394625
BM8	88	AD	M	51213hg133a11.cel	0.130043
BM8	89	AD	M	26560hg133a11.cel	-0.197446

## Sheet: Cingulate
Figure 4-source data 1: FSHR expression in the cingulate cortex of AD and non-AD human brains
Area	Age	Condition	Sex	Array_ID	log2(FSHR_Cingulate)		Area	Age	Condition	Sex	Array_ID	log2(FSHR_Cingulate)
BM23	72	AD	F	58623hg133a11.cel	-0.0490704		BM23	82	NL	F	35103hg133a11.cel	0.0746317
BM23	79	AD	F	50412hg133a11.cel	-0.220332		BM23	83	NL	F	35205hg133a11.cel	-0.0300226
BM23	84	AD	F	35064hg133a11.cel	-0.149014		BM23	85	NL	F	35109hg133a11.cel	-0.234568
BM23	84	AD	F	35067hg133a11.cel	0.381598		BM23	86	NL	F	37270hg133a11.cel	0.0705099
BM23	84	AD	F	35082hg133a11.cel	-0.0486574		BM23	89	NL	F	35196hg133a11.cel	-0.108859
BM23	85	AD	F	45412hg133a11.cel	0.0735578		BM23	90	NL	F	37233hg133a11.cel	-0.440814
BM23	87	AD	F	35097hg133a11.cel	0.13327		BM23	96	NL	F	35043hg133a11.cel	-0.0324106
BM23	87	AD	F	37253hg133a11.cel	0.016499		BM23	102	NL	F	35121hg133a21.cel	0.100206
BM23	88	AD	F	102803hg133a11.cel	0.254457		BM23	66	NL	M	37291hg133a11.cel	-0.376854
BM23	89	AD	F	37260hg133a11.cel	0.279688		BM23	69	NL	M	35100hg133a11.cel	0.0332127
BM23	90	AD	F	50404hg133a21.cel	0.141634		BM23	70	NL	M	35181hg133a11.cel	-0.116496
BM23	91	AD	F	35040hg133a11.cel	-0.340225		BM23	74	NL	M	35235hg133a11.cel	0.104362
BM23	92	AD	F	50452hg133a11.cel	0.206827		BM23	95	NL	M	35190hg133a11.cel	-0.0686984
BM23	93	AD	F	58595hg133a11.cel	-0.108055		BM32	62	NL	F	51292hg133a11.cel	0.0986433
BM23	95	AD	F	35118hg133a11.cel	0.0728254		BM32	75	NL	F	51290hg133a11.cel	0.159761
BM23	95	AD	F	35193hg133a11.cel	-0.126461		BM32	82	NL	F	49813hg133a11.cel	0.339044
BM23	99	AD	F	58665hg133a11.cel	-0.0327868		BM32	83	NL	F	49829hg133a21.cel	-0.179632
BM23	73	AD	M	50420hg133a21.cel	0.105045		BM32	85	NL	F	35110hg133a21.cel	-0.103428
BM23	80	AD	M	35079hg133a11.cel	0.337152		BM32	86	NL	F	35131hg133a11.cel	0.317307
BM23	80	AD	M	50460hg133a21.cel	0.542038		BM32	89	NL	F	35197hg133a11.cel	-0.248649
BM23	83	AD	M	58693hg133a11.cel	0.0355167		BM32	90	NL	F	35047hg133a11.cel	-0.224148
BM23	85	AD	M	102794hg133a11.cel	-0.245069		BM32	92	NL	F	108494hg133a11.cel	0.00901222
BM23	87	AD	M	35085hg133a21.cel	-0.385772		BM32	96	NL	F	35044hg133a11.cel	-0.0615559
BM23	87	AD	M	35187hg133a11.cel	-0.090251		BM32	102	NL	F	49816hg133a11.cel	0.0806766
BM23	88	AD	M	50384hg133a11.cel	0.150547		BM32	60	NL	M	51294hg133a11.cel	0.17011
BM23	89	AD	M	35127hg133a11.cel	-0.148279		BM32	69	NL	M	35101hg133a11.cel	0.038209
BM23	100	AD	M	58686hg133a11.cel	0.0270796		BM32	70	NL	M	35182hg133a11.cel	-0.395198
BM32	79	AD	F	50481hg133a11.cel	0.0947142		BM32	74	NL	M	49831hg133a21.cel	0.136074
BM32	83	AD	F	50471hg133a11.cel	0.243938		BM32	85	NL	M	51296hg133a11.cel	0.0680022
BM32	84	AD	F	35065hg133a11.cel	0.00701428		BM32	95	NL	M	35191hg133a11.cel	-0.0959606
BM32	84	AD	F	35068hg133a11.cel	-0.296414
BM32	84	AD	F	35083hg133a11.cel	-0.236445
BM32	87	AD	F	35077hg133a11.cel	-0.100224
BM32	87	AD	F	35098hg133a11.cel	-0.0637541
BM32	89	AD	F	35113hg133a21.cel	-0.276687
BM32	90	AD	F	35092hg133a11.cel	0.251532
BM32	90	AD	F	35224hg133a11.cel	0.0540662
BM32	91	AD	F	108630hg133a11.cel	0.286668
BM32	91	AD	F	35041hg133a11.cel	0.0749364
BM32	92	AD	F	50491hg133a11.cel	0.129068
BM32	93	AD	F	35218hg133a11.cel	0.32338
BM32	93	AD	F	58596hg133a11.cel	0.253674
BM32	94	AD	F	35035hg133a11.cel	-0.283174
BM32	95	AD	F	35119hg133a11.cel	-0.22285
BM32	95	AD	F	35194hg133a11.cel	0.421188
BM32	99	AD	F	58666hg133a11.cel	0.00919247
BM32	64	AD	M	35059hg133a11.cel	-0.0296412
BM32	80	AD	M	35080hg133a11.cel	0.179652
BM32	80	AD	M	50493hg133a11.cel	0.139957
BM32	83	AD	M	58694hg133a11.cel	-0.0238929
BM32	87	AD	M	35086hg133a11.cel	-0.306446
BM32	87	AD	M	35188hg133a11.cel	-0.0159373
BM32	88	AD	M	50473hg133a11.cel	0.299576
BM32	89	AD	M	35128hg133a11.cel	-0.197923
BM32	92	AD	M	35056hg133a21.cel	0.0665941

## Sheet: Temporal
Figure 4-source data 1: FSHR expression in the temporal cortex of AD and non-AD human brains
Area	Age	Condition	Sex	Array_ID	log2(FSHR_Temp)		Area	Age	Condition	Sex	Array_ID	log2(FSHR_Temp)
BM20	72	AD	F	58620hg133a11.cel	0.120037		BM20	62	NL	F	50322hg133a11.cel	0.117257
BM20	79	AD	F	50410hg133a11.cel	-0.0841289		BM20	82	NL	F	34883hg133a11.cel	0.359933
BM20	83	AD	F	50374hg133a11.cel	0.38426		BM20	83	NL	F	34985hg133a21.cel	-0.271058
BM20	84	AD	F	34844hg133a11.cel	0.162573		BM20	85	NL	F	34889hg133a11.cel	-0.163899
BM20	84	AD	F	37254hg133a11.cel	-0.136188		BM20	86	NL	F	37268hg133a11.cel	0.106343
BM20	85	AD	F	35000hg133a21.cel	-0.123215		BM20	89	NL	F	34976hg133a11.cel	0.443622
BM20	86	AD	F	45472hg133a11.cel	-0.0959835		BM20	90	NL	F	37231hg133a11.cel	0.016758
BM20	87	AD	F	34856hg133a21.cel	-0.137721		BM20	96	NL	F	34823hg133a11.cel	0.00150251
BM20	87	AD	F	34877hg133a11.cel	-0.0926886		BM20	102	NL	F	37264hg133a11.cel	0.169703
BM20	89	AD	F	34892hg133a11.cel	0.484667		BM20	60	NL	M	50327hg133a11.cel	0.0486894
BM20	90	AD	F	35003hg133a11.cel	-0.265717		BM20	66	NL	M	34988hg133a11.cel	-0.0327044
BM20	90	AD	F	50390hg133a11.cel	0.0278711		BM20	69	NL	M	34880hg133a11.cel	0.137438
BM20	91	AD	F	108626hg133a11.cel	0.414934		BM20	69	NL	M	35009hg133a11.cel	-0.113799
BM20	91	AD	F	34820hg133a11.cel	-0.211603		BM20	85	NL	M	50332hg133a31.cel	0.267351
BM20	92	AD	F	50450hg133a11.cel	-0.013001		BM21	62	NL	F	50323hg133a11.cel	-0.189376
BM20	93	AD	F	34997hg133a11.cel	-0.151966		BM21	82	NL	F	34884hg133a11.cel	0.126071
BM20	93	AD	F	58592hg133a11.cel	-0.0244641		BM21	83	NL	F	34986hg133a11.cel	0.0102763
BM20	94	AD	F	34814hg133a11.cel	-0.266396		BM21	85	NL	F	34890hg133a11.cel	0.386153
BM20	95	AD	F	34898hg133a11.cel	-0.0885396		BM21	86	NL	F	37269hg133a11.cel	-0.272554
BM20	99	AD	F	58662hg133a11.cel	0.0330963		BM21	89	NL	F	34977hg133a21.cel	0.442772
BM20	64	AD	M	34838hg133a11.cel	0.0326176		BM21	90	NL	F	37232hg133a11.cel	-0.30837
BM20	73	AD	M	50418hg133a21.cel	0.285812		BM21	96	NL	F	37229hg133a11.cel	-0.298451
BM20	80	AD	M	34859hg133a11.cel	0.0356441		BM21	102	NL	F	34902hg133a11.cel	0.0301199
BM20	80	AD	M	50458hg133a11.cel	0.343051		BM21	60	NL	M	50328hg133a11.cel	-0.178058
BM20	83	AD	M	58690hg133a11.cel	-0.12967		BM21	69	NL	M	34881hg133a11.cel	0.25821
BM20	87	AD	M	34865hg133a21.cel	-0.168615		BM21	69	NL	M	37305hg133a11.cel	-0.45902
BM20	88	AD	M	50382hg133a11.cel	0.211642		BM21	70	NL	M	45424hg133a11.cel	0.125235
BM20	89	AD	M	50343hg133a11.cel	0.114804		BM21	85	NL	M	50333hg133a11.cel	0.0565805
BM20	92	AD	M	37240hg133a21.cel	0.270625		BM21	95	NL	M	37286hg133a11.cel	0.0837111
BM21	79	AD	F	50411hg133a11.cel	-0.0994744		BM22	62	NL	F	50324hg133a11.cel	-0.223795
BM21	83	AD	F	50375hg133a11.cel	0.0372438		BM22	82	NL	F	19715hg133a11.cel	-0.199747
BM21	84	AD	F	34863hg133a21.cel	-0.0212736		BM22	83	NL	F	32494hg133a21.cel	-0.174891
BM21	84	AD	F	37244hg133a11.cel	-0.197322		BM22	85	NL	F	19735hg133a11.cel	0.0725174
BM21	85	AD	F	35001hg133a11.cel	0.193554		BM22	86	NL	F	19811hg133a11.cel	-0.149855
BM21	86	AD	F	34812hg133a11.cel	-0.204638		BM22	89	NL	F	32486hg133a21.cel	-0.161108
BM21	87	AD	F	34857hg133a11.cel	0.223534		BM22	90	NL	F	19540hg133a11.cel	-0.0147381
BM21	87	AD	F	34878hg133a11.cel	-0.213112		BM22	96	NL	F	19516hg133a11.cel	-0.0251479
BM21	88	AD	F	34980hg133a11.cel	0.402414		BM22	102	NL	F	19775hg133a11.cel	0.000821114
BM21	89	AD	F	34893hg133a11.cel	-0.290668		BM22	60	NL	M	50329hg133a11.cel	-0.0709648
BM21	90	AD	F	37299hg133a11.cel	-0.16115		BM22	69	NL	M	37216hg133a11.cel	-0.560207
BM21	90	AD	F	50391hg133a11.cel	0.235613		BM22	70	NL	M	32468hg133a11.cel	-0.128289
BM21	91	AD	F	34821hg133a11.cel	-0.347398		BM22	85	NL	M	50334hg133a11.cel	0.0491319
BM21	92	AD	F	50451hg133a11.cel	0.115141		BM22	95	NL	M	32476hg133a11.cel	-0.0659862
BM21	93	AD	F	58593hg133a11.cel	-0.0423965		BM36	62	NL	F	51245hg133a11.cel	0.158557
BM21	95	AD	F	34974hg133a21.cel	0.396883		BM36	75	NL	F	51196hg133a21.cel	0.614316
BM21	95	AD	F	37263hg133a31.cel	0.0562263		BM36	82	NL	F	19716hg133a11.cel	-0.16501
BM21	99	AD	F	58663hg133a11.cel	-0.0306239		BM36	83	NL	F	49809hg133a11.cel	-0.0351753
BM21	64	AD	M	37243hg133a11.cel	0.303799		BM36	85	NL	F	19736hg133a11.cel	0.11021
BM21	73	AD	M	50419hg133a11.cel	0.0322218		BM36	86	NL	F	49804hg133a11.cel	-0.0218678
BM21	80	AD	M	34860hg133a11.cel	0.431128		BM36	89	NL	F	33487hg133a11.cel	-0.0712681
BM21	83	AD	M	58691hg133a11.cel	-0.00358295		BM36	90	NL	F	19541hg133a11.cel	-0.16636
BM21	85	AD	M	102798hg133a11.cel	-0.0372491		BM36	90	NL	F	45463hg133a11.cel	0.0652595
BM21	85	AD	M	108474hg133a11.cel	-0.0159702		BM36	96	NL	F	25529hg133a11.cel	-0.250269
BM21	87	AD	M	34866hg133a21.cel	0.668493		BM36	102	NL	F	33455hg133a11.cel	0.480185
BM21	87	AD	M	34968hg133a11.cel	-0.178333		BM36	66	NL	M	34791hg133a11.cel	0.0921402
BM21	88	AD	M	50383hg133a11.cel	0.366531		BM36	69	NL	M	19704hg133a11.cel	-0.072711
BM21	89	AD	M	34908hg133a11.cel	-0.170559		BM36	69	NL	M	34803hg133a11.cel	0.0424614
BM21	92	AD	M	34836hg133a11.cel	0.151384		BM36	70	NL	M	33468hg133a21.cel	-0.0737362
BM22	72	AD	F	58622hg133a11.cel	-0.0533519		BM36	85	NL	M	51286hg133a11.cel	-0.0387173
BM22	79	AD	F	51234hg133a11.cel	0.608496		BM36	95	NL	M	33480hg133a11.cel	-0.234388
BM22	83	AD	F	51210hg133a11.cel	0.572856		BM38	62	NL	F	48033hg133a11.cel	0.360873
BM22	84	AD	F	19591hg133a11.cel	0.213443		BM38	82	NL	F	48081hg133a11.cel	0.0733614
BM22	84	AD	F	19663hg133a11.cel	-0.236773		BM38	83	NL	F	48122hg133a11.cel	0.128216
BM22	84	AD	F	45458hg133a11.cel	-0.544156		BM38	85	NL	F	48084hg133a11.cel	0.10524
BM22	85	AD	F	32508hg133a11.cel	-0.0147672		BM38	86	NL	F	48095hg133a11.cel	0.0593557
BM22	86	AD	F	45473hg133a11.cel	0.0826397		BM38	89	NL	F	48118hg133a11.cel	0.12369
BM22	87	AD	F	19607hg133a11.cel	-0.150204		BM38	92	NL	F	108496hg133a11.cel	-0.06499
BM22	89	AD	F	19743hg133a11.cel	0.221141		BM38	96	NL	F	48055hg133a11.cel	-0.0516148
BM22	90	AD	F	19675hg133a11.cel	0.299561		BM38	66	NL	M	48123hg133a11.cel	0.498692
BM22	90	AD	F	32510hg133a11.cel	0.00916433		BM38	69	NL	M	48080hg133a11.cel	0.376836
BM22	91	AD	F	32276hg133a11.cel	-0.23793		BM38	69	NL	M	48134hg133a11.cel	0.228032
BM22	92	AD	F	32478hg133a11.cel	0.339628		BM38	70	NL	M	48112hg133a11.cel	0.183343
BM22	93	AD	F	58594hg133a11.cel	0.0818834		BM38	85	NL	M	48047hg133a11.cel	-0.00994587
BM22	94	AD	F	19707hg133a11.cel	-0.488015		BM38	95	NL	M	48115hg133a11.cel	-0.0349379
BM22	94	AD	F	19783hg133a11.cel	-0.123777
BM22	94	AD	F	19791hg133a21.cel	0.0756774
BM22	94	AD	F	45471hg133a11.cel	0.043323
BM22	95	AD	F	19763hg133a11.cel	0.197455
BM22	99	AD	F	58664hg133a11.cel	-0.113739
BM22	103	AD	F	19767hg133a11.cel	-0.138673
BM22	64	AD	M	32278hg133a11.cel	-0.127735
BM22	74	AD	M	19683hg133a11.cel	0.0173903
BM22	80	AD	M	19647hg133a11.cel	0.0166626
BM22	83	AD	M	58692hg133a11.cel	0.284494
BM22	87	AD	M	19667hg133a11.cel	-0.35983
BM22	87	AD	M	32474hg133a11.cel	-0.0256877
BM22	88	AD	M	51215hg133a11.cel	-0.170826
BM22	89	AD	M	19807hg133a11.cel	-0.25796
BM22	92	AD	M	32277hg133a11.cel	0.259521
BM36	79	AD	F	51235hg133a21.cel	-0.0168066
BM36	84	AD	F	19584hg133a11.cel	-0.196186
BM36	84	AD	F	19592hg133a21.cel	0.496408
BM36	84	AD	F	19664hg133a21.cel	-0.230057
BM36	85	AD	F	33507hg133a11.cel	-0.159829
BM36	86	AD	F	25526hg133a11.cel	0.073349
BM36	87	AD	F	19608hg133a11.cel	0.210437
BM36	87	AD	F	19696hg133a11.cel	0.385013
BM36	87	AD	F	19772hg133a21.cel	-0.040194
BM36	89	AD	F	19744hg133a11.cel	0.0363245
BM36	90	AD	F	19676hg133a11.cel	-0.0482802
BM36	90	AD	F	34797hg133a11.cel	-0.248599
BM36	90	AD	F	51221hg133a11.cel	0.0362592
BM36	91	AD	F	25528hg133a11.cel	-0.0457392
BM36	94	AD	F	19500hg133a11.cel	0.239467
BM36	94	AD	F	19708hg133a21.cel	-0.27162
BM36	94	AD	F	19784hg133a11.cel	-0.017396
BM36	95	AD	F	19764hg133a11.cel	0.00699139
BM36	95	AD	F	34782hg133a11.cel	0.280068
BM36	99	AD	F	59075hg133a11.cel	-0.0751834
BM36	103	AD	F	19768hg133a21.cel	-0.0241628
BM36	80	AD	M	19648hg133a11.cel	-0.227501
BM36	83	AD	M	59085hg133a11.cel	0.336069
BM36	87	AD	M	19668hg133a11.cel	-1.7643e-05
BM36	87	AD	M	33476hg133a11.cel	-0.28372
BM36	88	AD	M	51216hg133a11.cel	0.0400071
BM36	89	AD	M	19808hg133a11.cel	-0.254707
BM36	96	AD	M	108444hg133a11.cel	0.0102019
BM38	79	AD	F	48029hg133a11.cel	-0.0441494
BM38	83	AD	F	48019hg133a11.cel	1.04575
BM38	84	AD	F	48064hg133a11.cel	0.268589
BM38	84	AD	F	48070hg133a21.cel	-0.0961914
BM38	85	AD	F	48128hg133a11.cel	0.152251
BM38	86	AD	F	48049hg133a11.cel	-0.0348678
BM38	87	AD	F	48066hg133a11.cel	0.291304
BM38	87	AD	F	48078hg133a21.cel	-0.0137682
BM38	89	AD	F	48085hg133a11.cel	0.0835037
BM38	90	AD	F	108462hg133a11.cel	0.209801
BM38	90	AD	F	48027hg133a11.cel	0.285089
BM38	90	AD	F	48130hg133a11.cel	0.102414
BM38	91	AD	F	108632hg133a11.cel	0.231547
BM38	91	AD	F	48053hg133a11.cel	-0.114878
BM38	92	AD	F	48043hg133a11.cel	-0.23519
BM38	93	AD	F	48126hg133a11.cel	0.0932832
BM38	93	AD	F	59046hg133a11.cel	0.179098
BM38	95	AD	F	48089hg133a21.cel	-0.241485
BM38	95	AD	F	48116hg133a21.cel	0.545256
BM38	64	AD	M	57590hg133a11.cel	0.00344849
BM38	73	AD	M	48031hg133a11.cel	0.635245
BM38	80	AD	M	48045hg133a11.cel	0.311714
BM38	83	AD	M	59086hg133a11.cel	-0.147694
BM38	87	AD	M	48072hg133a11.cel	0.204761
BM38	87	AD	M	48113hg133a11.cel	0.135218
BM38	88	AD	M	48021hg133a11.cel	0.00525189
BM38	89	AD	M	48093hg133a11.cel	0.0301685
BM38	92	AD	M	57662hg133a11.cel	0.387202
BM38	96	AD	M	108445hg133a11.cel	0.25759

## Sheet: Parietal
Figure 4-source data 1: FSHR expression in the parietal cortex of AD and non-AD human brains
Area	Age	Condition	Sex	Array_ID	log2(FSHR_Parietal)		Area	Age	Condition	Sex	Array_ID	log2(FSHR_Parietal)
BM7	79	AD	F	51231hg133a11.cel	0.0429487		BM7	83	NL	F	34789hg133a11.cel	-0.272318
BM7	84	AD	F	19585hg133a11.cel	-0.275773		BM7	85	NL	F	19737hg133a11.cel	-0.00149584
BM7	85	AD	F	33508hg133a11.cel	-0.253631		BM7	86	NL	F	32196hg133a11.cel	-0.135088
BM7	86	AD	F	25503hg133a11.cel	0.127482		BM7	89	NL	F	33488hg133a11.cel	-0.233665
BM7	87	AD	F	19609hg133a11.cel	-0.393253		BM7	92	NL	F	108500hg133a11.cel	0.354637
BM7	87	AD	F	32157hg133a11.cel	0.160138		BM7	96	NL	F	25506hg133a11.cel	-0.0651684
BM7	89	AD	F	32170hg133a21.cel	-0.117883		BM7	102	NL	F	45442hg133a11.cel	0.213809
BM7	90	AD	F	34798hg133a11.cel	0.0147672		BM7	66	NL	M	37210hg133a11.cel	0.220284
BM7	91	AD	F	45468hg133a21.cel	-0.196633		BM7	69	NL	M	34804hg133a11.cel	-0.0935736
BM7	94	AD	F	25501hg133a11.cel	0.0367165		BM7	69	NL	M	46230hg133a11.cel	0.0915442
BM7	95	AD	F	37203hg133a11.cel	0.343863		BM7	70	NL	M	33469hg133a11.cel	-0.317661
BM7	95	AD	F	50341hg133a11.cel	0.151062		BM7	74	NL	M	34807hg133a11.cel	-0.220835
BM7	62	AD	M	19645hg133a21.cel	0.38578		BM7	95	NL	M	33481hg133a11.cel	-0.243532
BM7	80	AD	M	19649hg133a11.cel	-0.170502
BM7	83	AD	M	59083hg133a11.cel	-0.00191116
BM7	87	AD	M	19669hg133a11.cel	0.573204
BM7	87	AD	M	33477hg133a21.cel	-0.0642028
BM7	88	AD	M	51212hg133a11.cel	0.035471

## Sheet: Occipital
Figure 4-source data 1: FSHR expression in the occipital cortex of AD and non-AD human brains
Area	Age	Condition	Sex	Array_ID	log2(FSHR_Occipital)		Area	Age	Condition	Sex	Array_ID	log2(FSHR_Occipital)
BM17	79	AD	F	51233hg133a21.cel	0.263203		BM17	82	NL	F	37181hg133a11.cel	0.138676
BM17	84	AD	F	45453hg133a11.cel	0.163186		BM17	83	NL	F	33495hg133a11.cel	-0.00938129
BM17	85	AD	F	33506hg133a11.cel	0.0832095		BM17	84	NL	F	46247hg133a21.cel	0.70503
BM17	87	AD	F	32305hg133a31.cel	-0.103198		BM17	85	NL	F	32171hg133a11.cel	0.337204
BM17	88	AD	F	102804hg133a21.cel	0.669988		BM17	86	NL	F	32197hg133a11.cel	-0.0750771
BM17	88	AD	F	33490hg133a11.cel	0.248307		BM17	89	NL	F	33486hg133a11.cel	-0.230335
BM17	89	AD	F	32173hg133a41.cel	0.0244184		BM17	102	NL	F	20017hg133a11.cel	0.628788
BM17	90	AD	F	33510hg133a11.cel	-0.150091		BM17	66	NL	M	33496hg133a21.cel	-0.0714951
BM17	91	AD	F	113023hg133a11.cel	0.8122		BM17	69	NL	M	32160hg133a11.cel	0.0738716
BM17	91	AD	F	32106hg133a11.cel	0.104424		BM17	69	NL	M	33512hg133a11.cel	-0.0514908
BM17	92	AD	F	51274hg133a11.cel	-0.155701		BM17	70	NL	M	33467hg133a11.cel	-0.343043
BM17	93	AD	F	33505hg133a11.cel	-0.243795		BM17	74	NL	M	33517hg133a11.cel	-0.0235109
BM17	94	AD	F	32099hg133a51.cel	-0.0928059		BM17	95	NL	M	33479hg133a11.cel	-0.276264
BM17	94	AD	F	32164hg133a11.cel	0.0586734
BM17	95	AD	F	32181hg133a11.cel	0.234289
BM17	100	AD	F	102903hg133a11.cel	0.695066
BM17	80	AD	M	32141hg133a11.cel	-0.0165477
BM17	83	AD	M	58689hg133a11.cel	0
BM17	85	AD	M	108472hg133a11.cel	0.12871
BM17	87	AD	M	37179hg133a11.cel	-0.0240388
BM17	88	AD	M	51214hg133a21.cel	0.367424
BM17	89	AD	M	32193hg133a11.cel	-0.138864
