# Supplementary figures and images for: Brain atlas for glycoprotein hormone receptors at single-transcript level
Source: eLife journal article supplement (doi:10.7554/elife.79612), 2022-09-02

Figure 1-figure supplement 1

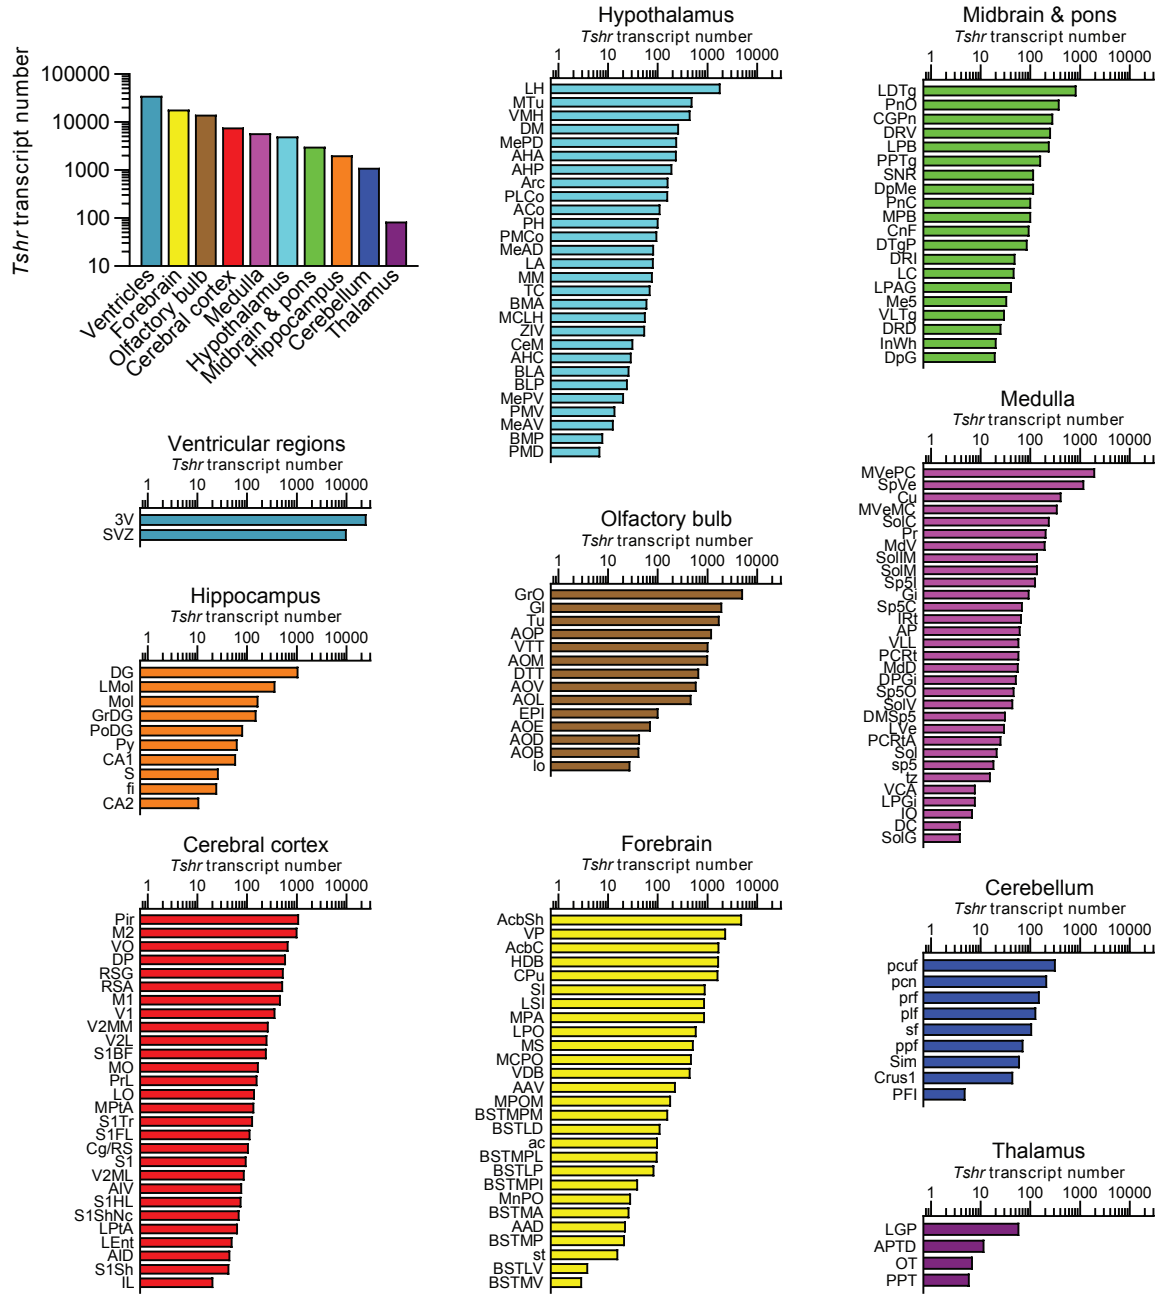

Supplement: supp [file elife_poa_e79612_Figure_1_figure_supplement_1.pdf › elife_poa_e79612_Figure_1_figure_supplement_1.pdf]

Figure 1-figure supplement 2

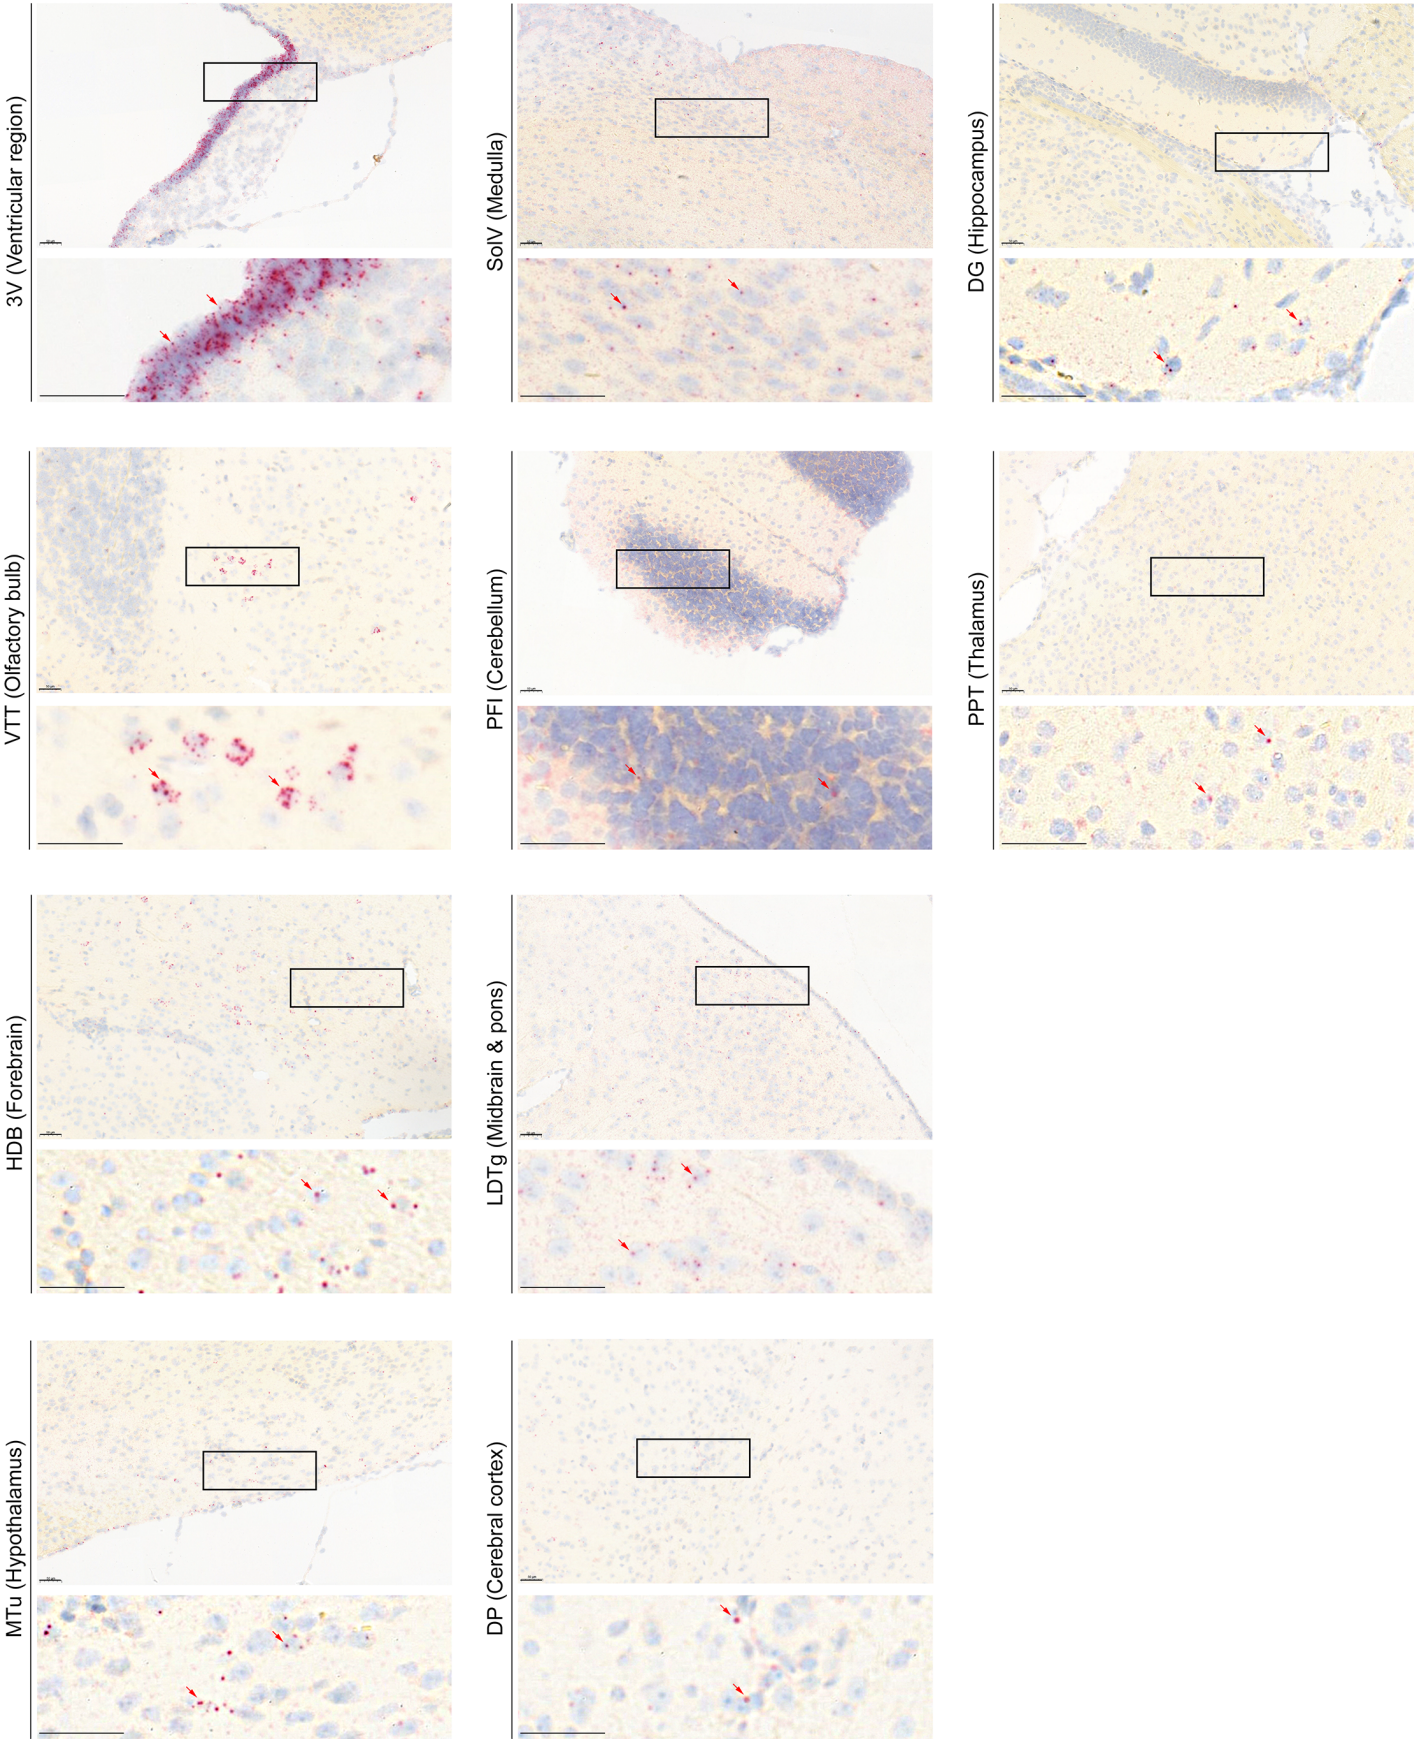

Supplement: supp [file elife_poa_e79612_Figure_1_figure_supplement_2.pdf › elife_poa_e79612_Figure_1_figure_supplement_2.pdf]

Figure 2-figure supplement 2

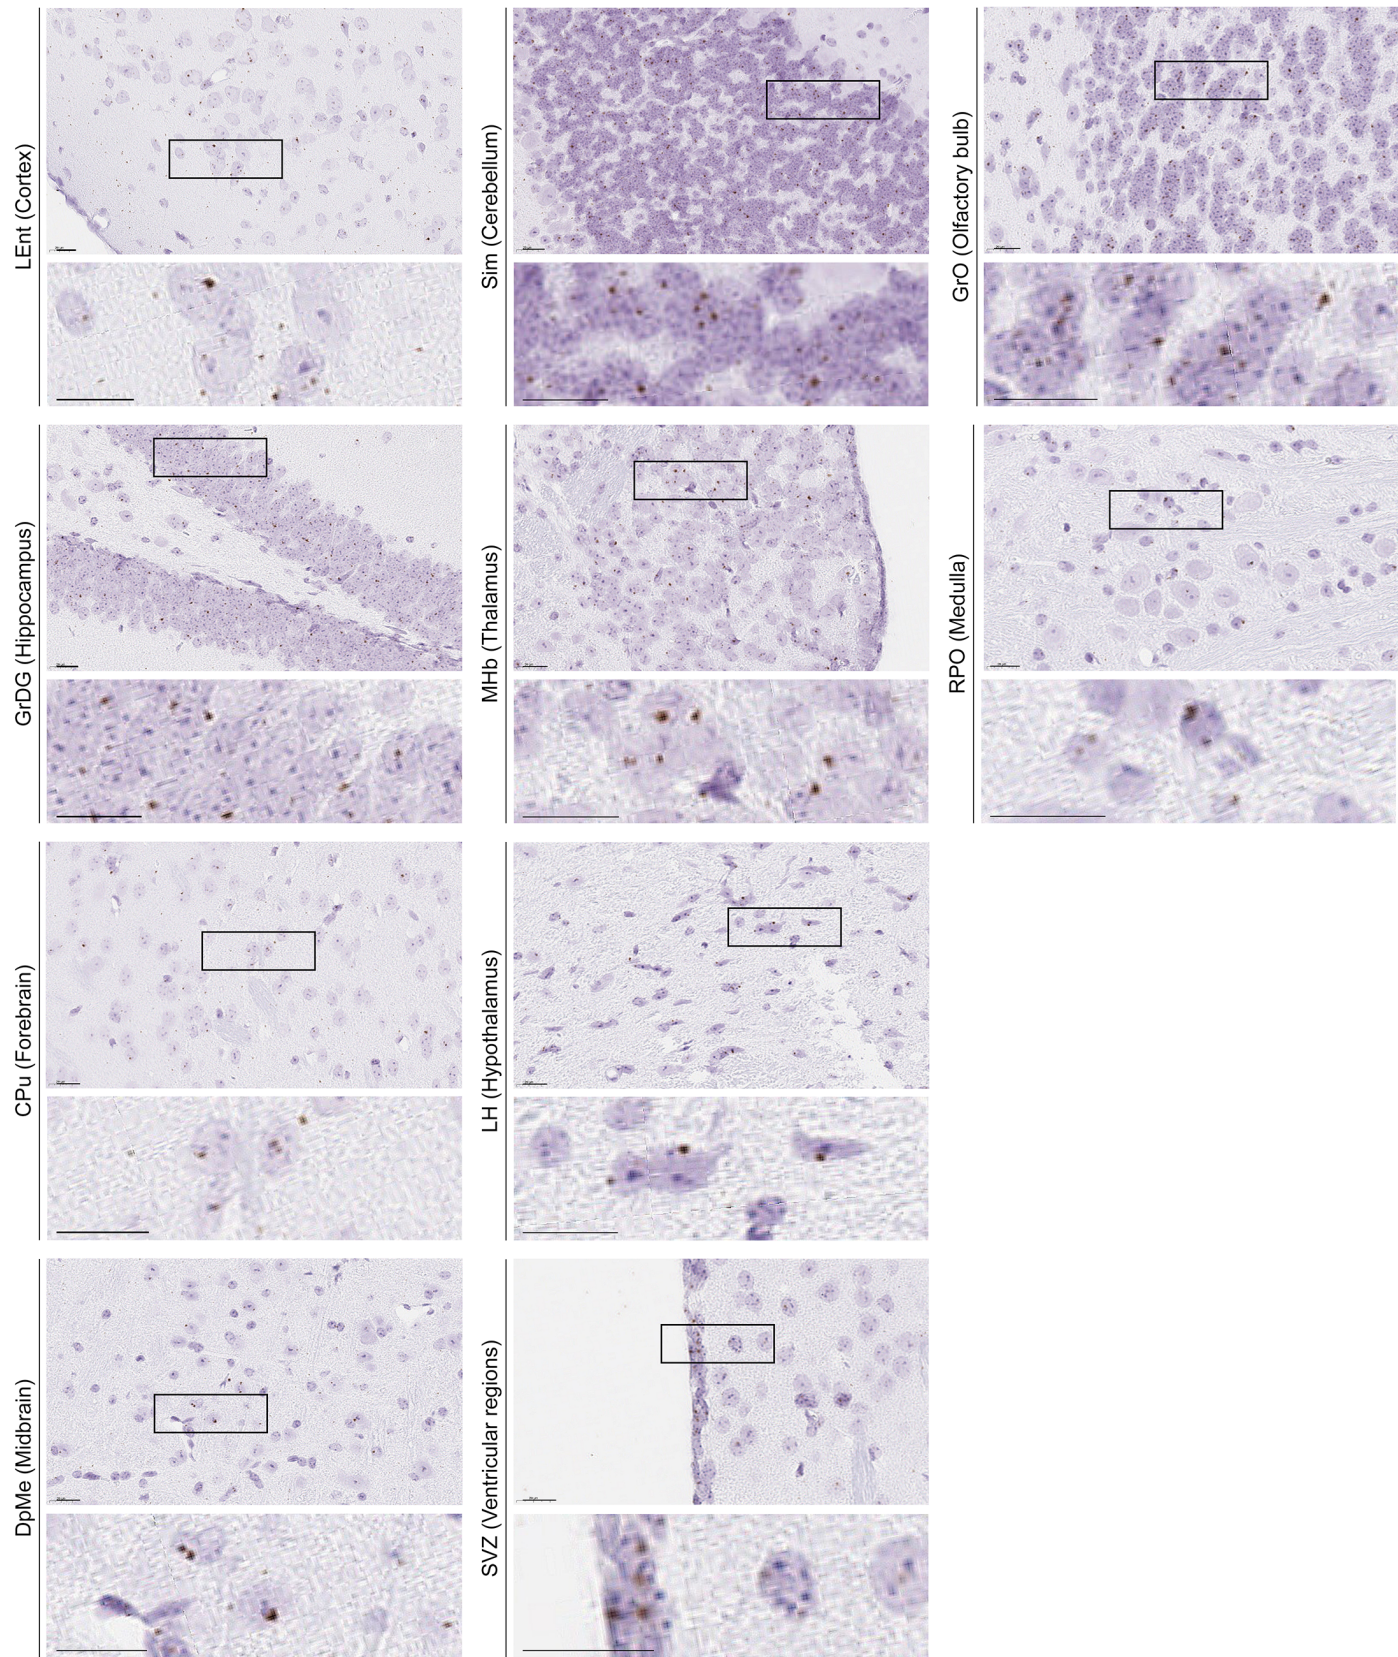

Supplement: supp [file elife_poa_e79612_Figure_2_figure_supplement_2.pdf › elife_poa_e79612_Figure_2_figure_supplement_2.pdf]

### Figure 3-figure supplement 1

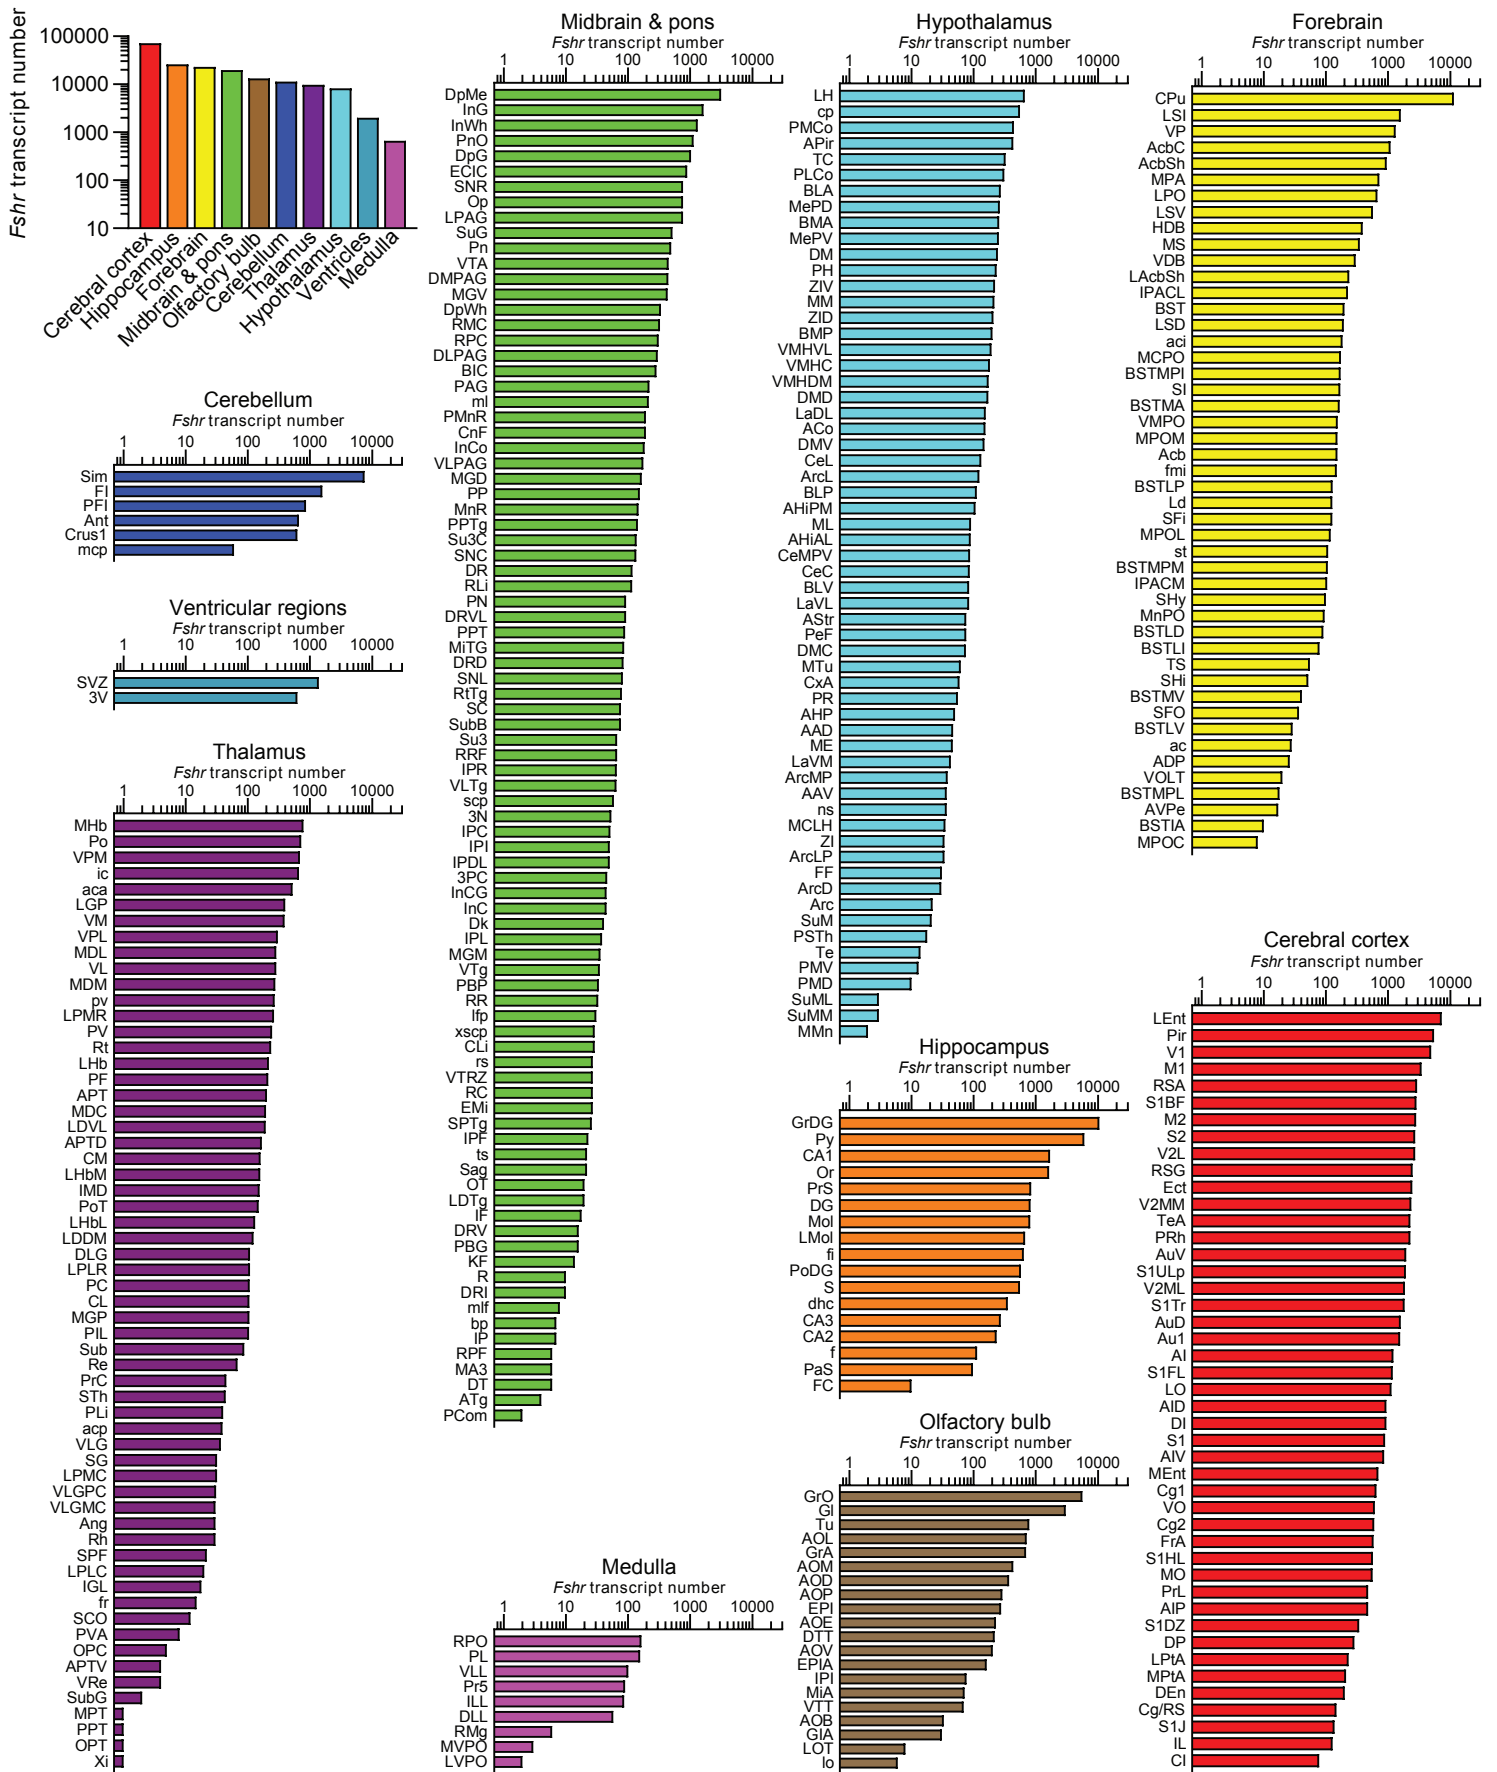

Supplement: supp [file elife_poa_e79612_Figure_3_figure_supplement_1.pdf › elife_poa_e79612_Figure_3_figure_supplement_1.pdf]

Figure 3-figure supplement 2

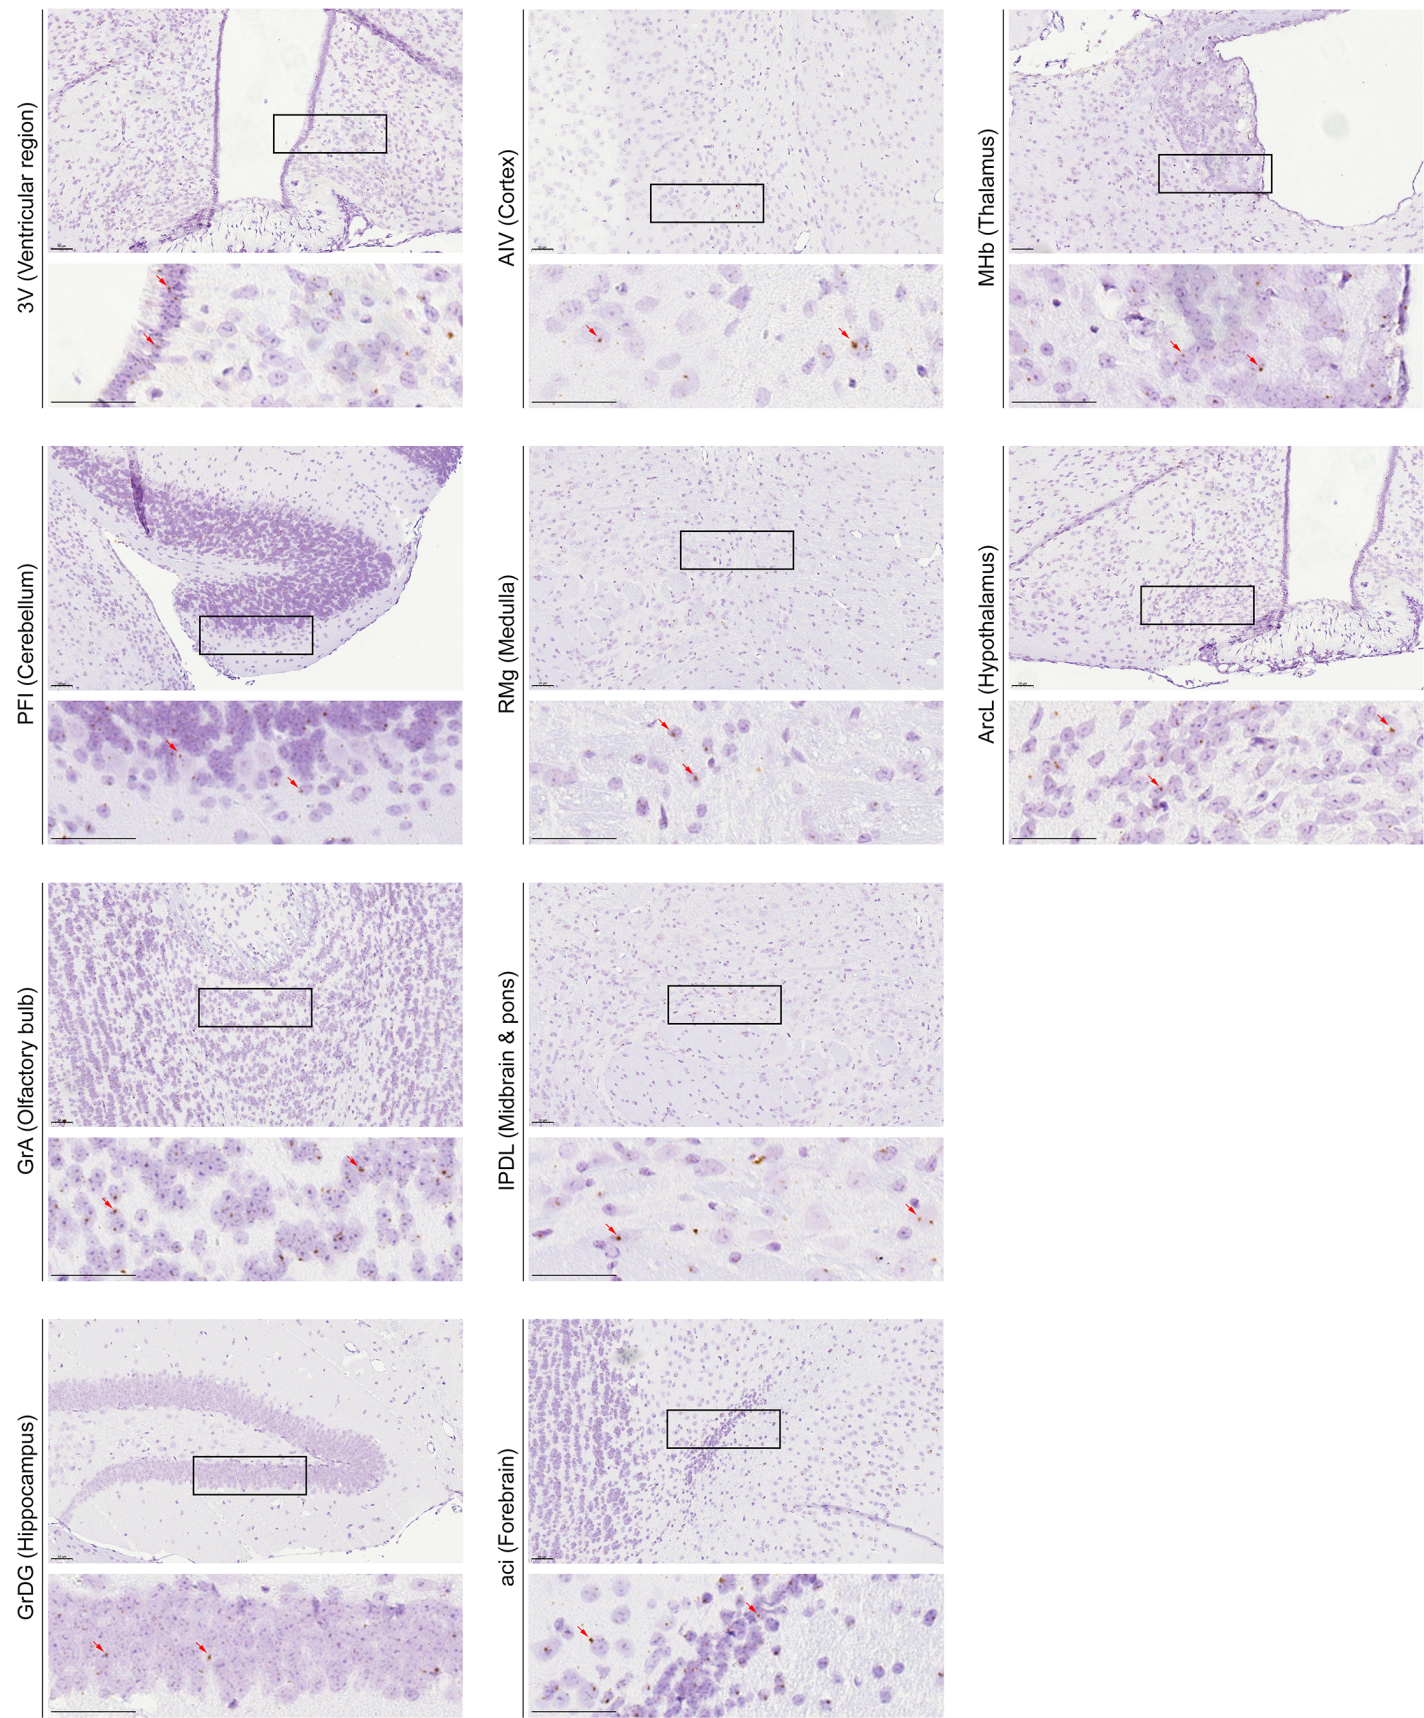

Supplement: supp [file elife_poa_e79612_Figure_3_figure_supplement_2.pdf › elife_poa_e79612_Figure_3_figure_supplement_2.pdf]
